# Awake responses suggest inefficient dense coding in the mouse retina

**Authors:** Tom Boissonnet<sup>1,2</sup>, Matteo Tripodi<sup>1</sup>, Hiroki Asari\*<sup>1</sup>

**Affiliations:**

1. Epigenetics and Neurobiology Unit, EMBL Rome, European Molecular Biology Laboratory, Monterotondo, 00015, Italy
2. Collaboration for joint PhD degree between EMBL and Université Grenoble Alpes, Grenoble Institut des Neurosciences, La Tronche, 38700, France

**\*Corresponding author:** Hiroki Asari, E-mail: [asari@embl.it](mailto:asari@embl.it)

**Author contributions:** T.B. and H.A. designed the study; T.B. and M.T. performed experiments; T.B. analyzed the results; and T.B. and H.A. wrote the manuscript.

**Competing interests:** The authors declare no competing financial interests.

**Key words:** retinal ganglion cells; in vivo recordings; awake; anesthesia; efficient coding.

**Acronyms:** CMOS, complementary metal-oxide semiconductor; DS, direction-selectivity; dLGN, dorsal lateral geniculate nucleus; DLP, digital light processing; FMM, fentanyl, medetomidine and midazolam; GABA, gamma-aminobutyric acid; LED, light emitting diode; OS, orientation-selectivity; OT, optic tract; PCA, principal component analysis; PFA, paraformaldehyde; RGC, retinal ganglion cells; SC, superior colliculus; STA, spike-triggered average; UV, ultraviolet.

## 1 **Abstract**

2 The structure and function of the vertebrate retina have been extensively studied across  
3 species with an isolated, *ex vivo* preparation. Retinal function *in vivo*, however, remains  
4 elusive, especially in awake animals. Here we performed single-unit extracellular recordings  
5 in the optic tract of head-fixed mice to compare the output of awake, anesthetized, and *ex vivo*  
6 retinas. While the visual response properties were overall similar, we found that awake retinal  
7 output had 1) faster kinetics with less variability in the response latencies across different cell  
8 types; and 2) higher firing activity, by ~20 Hz on average, for both baseline and visually evoked  
9 responses. Notably, unlike the other conditions, many awake ON cells did not increase firing  
10 in response to light increments due to high baseline activity near saturation. Instead, they  
11 encoded light intensity fluctuations primarily by decreasing firing upon light decrements. In  
12 either condition, the visual message remains the same: the more spikes, the higher light  
13 intensity. The awake response patterns, however, violate efficient coding principles, predicting  
14 that sensory systems should favor firing patterns minimizing energy consumption. Our findings  
15 suggest that the retina employs dense coding *in vivo*, rather than sparse efficient coding as  
16 suggested from previous *ex vivo* studies.

## 17 **Introduction**

18 The vertebrate retina is one of the best characterized parts of the central nervous system  
19 (Gollisch and Meister, 2010; Masland, 2012). It consists of ~100 cell types in total (Shekhar et  
20 al., 2016; Yan et al., 2020), including ~30 types of retinal ganglion cells (RGCs) that send the  
21 retinal output signals to the brain via the optic nerve (Sanes and Masland, 2015; Baden et al.,  
22 2016). Each of these RGC types forms distinct neural circuits within the retina to extract  
23 specific features of the visual image coming into the eye, such as color, contrast, and motion.  
24 The retina thus performs parallel and dynamic processing as the first stage of the visual  
25 pathway.

26 Most of our knowledge on retinal function has been obtained from *ex vivo* studies  
27 because isolated retinal tissues are nevertheless functional, i.e., responsive to light (Barlow et  
28 al., 1964). While powerful, however, *ex vivo* physiological approaches have certain limitations.  
29 First, one cannot perform long-term recordings (Meister et al., 1994). Second, one cannot  
30 avoid artifacts due to retinal dissection, such as the effect of cutting RGC axons (Vidal-Sanz  
31 et al., 2017) or retinal epithelial detachment (Strauss, 2005). Neuromodulatory effects of  
32 retinopetal pathways are also difficult to study in an isolated retinal preparation (Repérant et  
33 al., 2006; Esposti et al., 2013). *In vivo* studies are thus indispensable for clarifying retinal  
34 function thoroughly.

35 Previous physiological studies on the retina *in vivo* were conducted mostly under  
36 anesthetized—and often paralyzed—conditions. To monitor RGC activity *in vivo*, for example,  
37 single-unit recordings were made directly from the retina (Kuffler, 1953), at the optic nerve or  
38 tract fibers (Hartline, 1938; Lettvin et al., 1959; Enroth-Cugell and Robson, 1966; Mastronarde,  
39 1983, 1985; Sagdullaev and McCall, 2005), or in the form of “slow-potential” in the dorsal  
40 lateral geniculate nucleus (dLGN; Bishop et al., 1962; Kaplan and Shapley, 1984). Optical  
41 methods were also developed to image the activity of retinal neurons directly through the pupil  
42 of a live animal (Geng et al., 2012; Yin et al., 2013, 2014). In contrast, thus far only a handful  
43 of studies have reported awake recordings from the retina (Esposti et al., 2013; Hong et al.,  
44 2018) or its outputs (Weyand, 2007; Liang et al., 2018, 2020; Schröder et al., 2020; Sibille et  
45 al., 2021). Thus, despite a long history of research on the retina, it still remains unclear what  
46 exactly the eye tells the brain in awake animals.

47 As recordings from awake behaving animals became routine for many brain areas  
48 (Dombeck et al., 2007; Jun et al., 2017), growing attention has been paid to the roles of an  
49 animal’s behavior and internal brain states in the function of the sensory systems (Niell and  
50 Stryker, 2010; Lee and Dan, 2012). For example, systematic studies on the early visual  
51 pathway showed higher firing activity and faster response dynamics in both dLGN (Durand et  
52 al., 2016) and the superior colliculus (SC; De Franceschi and Solomon, 2018) of awake

53 animals than those under anesthesia. A critical question that was left unanswered is to what  
54 extent such differences originate in the retina.

55 To clarify differences in the retinal visual response properties between awake and  
56 anesthetized conditions, here we employed single-unit extracellular recording techniques from  
57 head-fixed mice. Specifically, the electrodes were placed in the optic tract (OT), a bundle of  
58 nerve fibers composed of RGC axons as they project from the eye to their main targets: dLGN  
59 and SC. These recordings are superior to direct *in vivo* retinal recordings (e.g., with epiretinally  
60 implanted mesh electrodes; Hong et al., 2018) because the retinal circuits and the eye optics  
61 remain intact, and also to those extracellular recordings in SC (Sibille et al., 2021) or dLGN  
62 (Weyand, 2007) because RGC axonal signals do not need to be disambiguated from those of  
63 local axons or somata. This advantage also exists for calcium imaging recordings of the retina  
64 directly in the eye of immobilized zebrafish larvae (Esposti et al., 2013) or those of RGC axon  
65 terminals in dLGN (Liang et al., 2018, 2020) or SC (Schröder et al., 2020). These imaging  
66 approaches, however, lack the temporal precision as in the electrophysiology, which is an  
67 important aspect of the information processing in the retina (Gollisch and Meister, 2008).

68 From our OT recordings, we examined the visual responses to a set of visual stimuli  
69 widely used for probing retinal function *ex vivo* (Baden et al., 2016; Jouty et al., 2018),  
70 including moving gratings, white-noise stimuli, and full-field flickering stimuli at different  
71 temporal frequencies. We used two different anesthetics that are commonly used in  
72 neuroscience research: isoflurane gas and an intraperitoneal combination of fentanyl,  
73 medetomidine and midazolam (FMM). In both cases, we found that the temporal dynamics of  
74 the retinal outputs were slower than in awake recordings, consistent with the previous studies  
75 on the effects of anesthesia in retinorecipient areas (dLGN, Durand et al., 2016; SC, De  
76 Franceschi and Solomon, 2018). We also found that the retinal outputs in an awake condition  
77 had higher baseline firing rates than in anesthetized or *ex vivo* conditions. As expected from  
78 previous *ex vivo* studies (Masland, 2012; Sanes and Masland, 2015; Baden et al., 2016; Jouty  
79 et al., 2018), anesthetized ON cells encoded light increments by increasing firing from their

80 low baseline firing rates. In contrast, many awake ON cells encoded light decrements by  
81 decreasing firing from their high baseline firing rates, but not light increments due to saturation.  
82 They convey the same information in either condition: the more spikes, the higher light  
83 intensity. However, the amount of information transmitted per spike is lower in the awake  
84 responses. This disagrees with sparse efficient coding (Attneave, 1954; Barlow and  
85 Rosenblith, 1961) or minimum energy principles (Laughlin, 2001) that are widely used as a  
86 model of the early visual processing (Atick and Redlich, 1990; Gjorgjieva et al., 2019). A new  
87 theoretical framework based on dense coding principles will thus be needed to explain retinal  
88 function *in vivo*.

## 89 **Results**

### 90 **Characterization of retinal output responses *in vivo***

91 To monitor retinal output *in vivo*, we established extracellular single-unit recording methods  
92 from axons of retinal ganglion cells (RGCs) in the optic tract (OT) of head-fixed mice (Figure  
93 1). In total, we made 17 chronic (75 cells) and 52 acute recordings (298 cells with isoflurane;  
94 103 cells with FMM), where a standardized set of visual stimuli were presented to the subject  
95 animal to characterize the visual response properties of the recorded cells (for ~1 hour; Figure  
96 1A,B; see Methods for details).

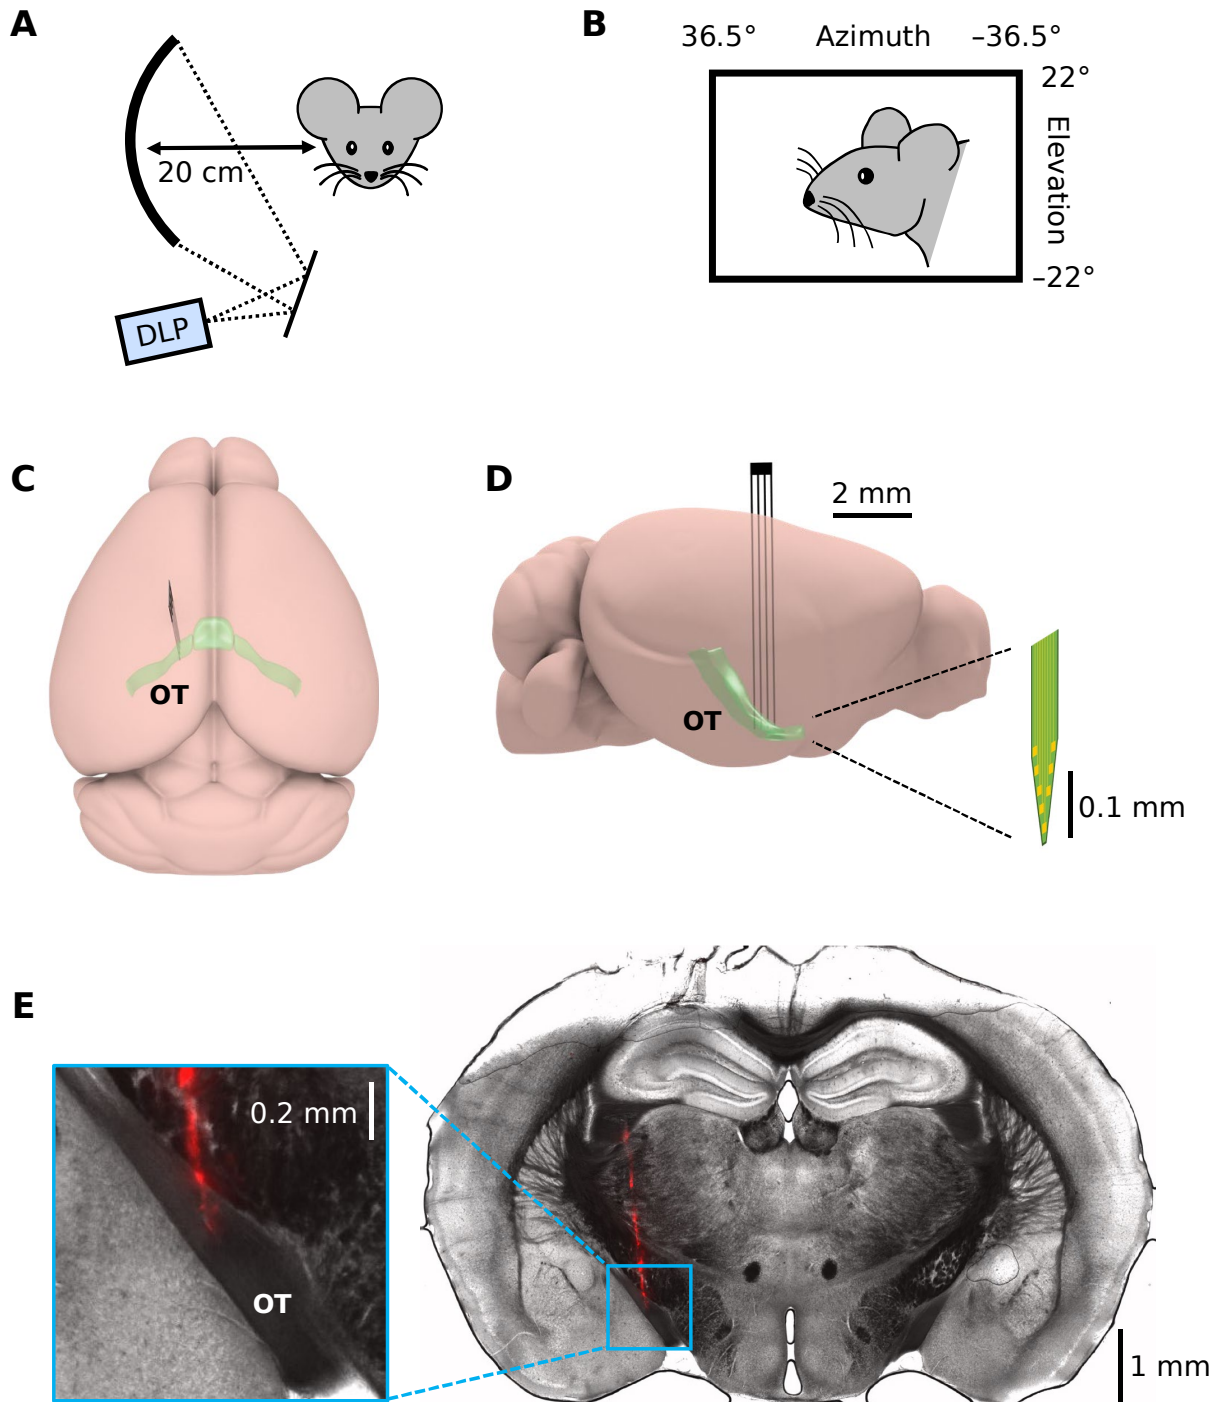

97

98 **Figure 1: *in vivo* extracellular recordings from the mouse optic tract.** *A,B*: Schematic  
99 diagram of the experimental set-up. We presented visual stimuli to a head-fixed mouse using  
100 a digital light processing (DLP) device projecting images onto a spherical screen placed  
101 laterally to the subject animal (*A*, front-view; *B*, side-view). See Methods for details and  
102 specifications. *C,D*: Schematic diagram (*C*, top-view; *D*, side-view) of the brain and electrode  
103 location to target the optic tract (OT). *E*: Histological image of a representative brain sample  
104 (coronal section, 150  $\mu$ m thick) showing the electrode trace (red, Dil stain deposited on the  
105 electrode).

106 We performed physiological cell-type classification of the recorded cells (see Methods  
107 for details) and identified most major RGC types in our data sets (Figure 2; Sanes and Masland,  
108 2015; Baden et al., 2016; Jouty et al., 2018). Specifically, we first identified reliably responsive  
109 cells based on the visual responses to full-field contrast-inverting stimuli (Figure 2A,B), and  
110 categorized their response polarity into ON, ON/OFF, OFF types (Figure 2C). In both  
111 anesthetized and awake conditions, we found around 30-50% of ON cells, 10-30% of ON/OFF  
112 cells, and around 20% of OFF cells in our data sets. We then further classified the cells from  
113 the viewpoint of motion sensitivity, based on the responses to moving gratings in eight different  
114 directions (Figure 2D-F). In the anesthetized conditions, about a half of the cells (42-56%)  
115 were motion sensitive regardless of their response polarities or anesthetics. In contrast, we  
116 found much less motion sensitive cells (15%) in the awake condition. This is consistent with  
117 the previous results in the superior colliculus (SC; Kasai and Isa, 2021), and presumably due  
118 to the consequence of optokinetic nystagmus (Kretschmer et al., 2017). When a motion in a  
119 wide visual field is presented, such as moving gratings, mice show compensatory eye  
120 movements to stabilize the image on the retina (Tabata et al., 2010). As a result, motion  
121 sensitive RGCs might have been driven less in the awake condition.

122 Our approach cannot obtain some RGC types that do not send their axons to OT, such  
123 as the one projecting to the suprachiasmatic nucleus via the retinohypothalamic tract (Li and  
124 Schmidt, 2018). Nevertheless, the fact that we obtained diverse types of visual responses,  
125 better than previous *in vivo* studies (Hong et al., 2018; Liang et al., 2018; Schröder et al., 2020;  
126 Sibille et al., 2021) if not all the ~30 RGC types observed *ex vivo* (Baden et al., 2016; Jouty et  
127 al., 2018), validates our recording methods to monitor retinal outputs *in vivo*.



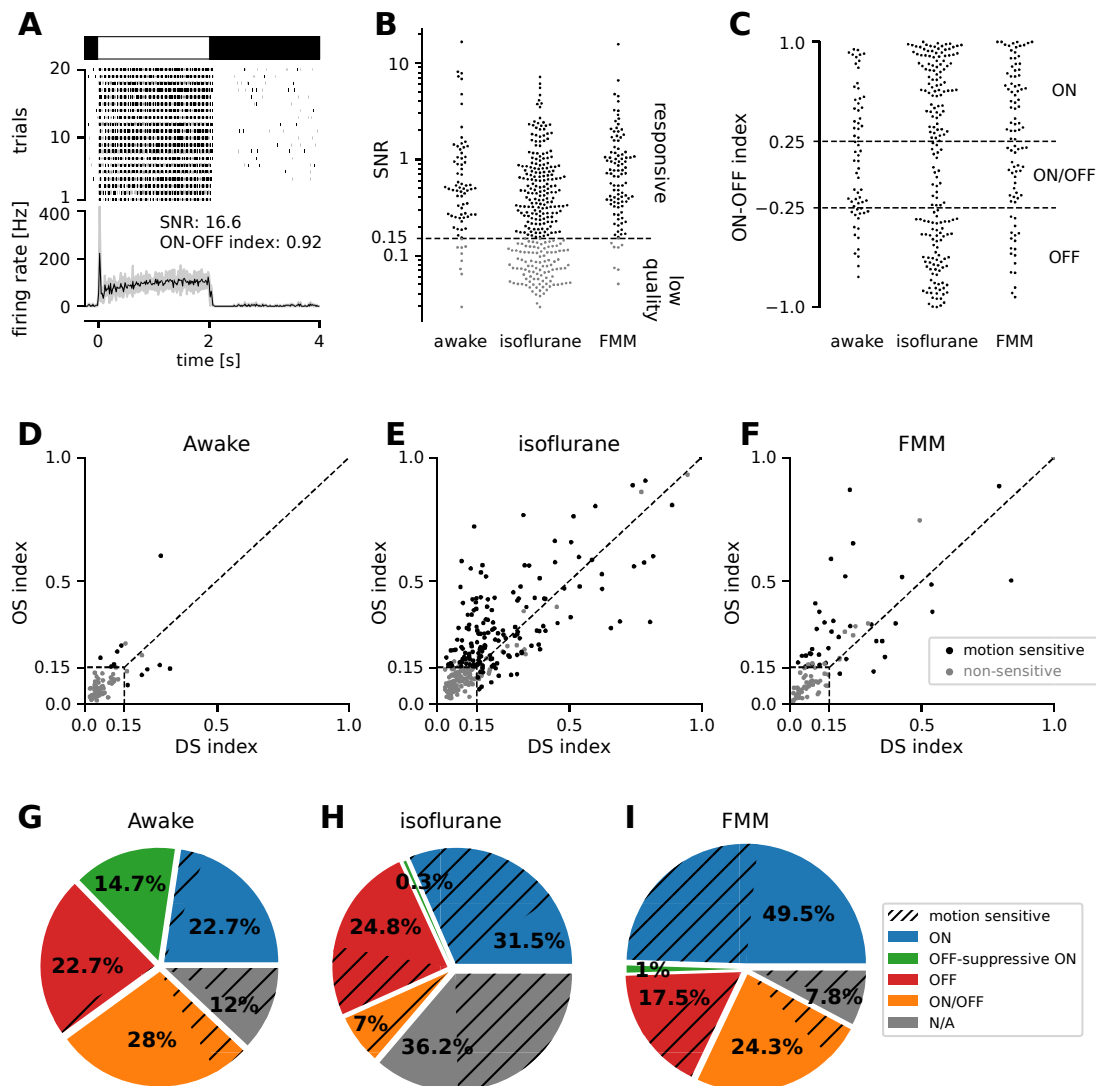

128

129 **Figure 2: Physiological classification of retinal output responses *in vivo*.** A:  
 130 Representative retinal output responses to full-field contrast inverting stimuli: top, stimulus;  
 131 middle, raster graph over trials; bottom, peri-stimulus time histogram (black, mean; gray,  
 132 variance; signal-to-noise ratio (SNR), Eq.(1) in Methods; ON-OFF index, Eq.(2)). B: SNR of  
 133 the retinal output responses in different recording conditions. We set a threshold at 0.15 to  
 134 identify reliably responsive cells (black) and low-quality unclassifiable cells (gray). C: ON-OFF  
 135 index distributions from the reliably responsive cells. While no apparent clusters were  
 136 identified, we set a threshold at  $\pm 0.25$  to categorize the response polarity into ON, ON/OFF,  
 137 and OFF types. Within the ON cell type, we further identified an OFF-suppressive type based  
 138 on the full-field flickering stimulus responses (Figure 3). D-F: Distribution of DS/OS indices  
 139 (Eq.(3)) in each recording condition (D, awake; E, isoflurane; F, FMM). We set a threshold at  
 140 0.15 (with  $p < 0.2$ ) to identify motion sensitive (black) and non-sensitive (gray) cells. G-I:  
 141 Fraction of identified cell types *in vivo*: ON (blue; OFF-suppressive type in green), OFF (red),  
 142 ON/OFF (orange), and the rest unclassifiable cells ("N/A", gray). Cells in each category were  
 143 further divided based on the motion selectivity (hatched). The OFF-suppressive ON cells were  
 144 prominent in the awake condition (G, 11/75 cells), but rarely observed under anesthesia (H,  
 145 isoflurane, 1/298 cells; I, FMM, 1/103 cells).



## 146 **Higher firing in awake than in anesthetized mice**

147 For characterizing the retinal output properties *in vivo*, we first analyzed the responses to full-  
148 field sinusoidally flickering stimuli that linearly changed the amplitude over time (from 0 to  
149 100% contrast for 10 s; see Figure 3A-C for representative responses). An even power of sine  
150 function with a sigmoid envelope generally fitted well to the responses (Eq. (6) in Methods).  
151 We then focused on the parameter values to analyze the response properties in different  
152 recording conditions.

153 First, we found significantly higher baseline firing rates in awake mice ( $18 \pm 26$  Hz;  
154 median  $\pm$  interquartile range) than in those under anesthesia (isoflurane,  $2 \pm 6$  Hz,  $p < 0.001$ ,  
155 *U*-test; FMM,  $2 \pm 4$  Hz,  $p < 0.001$ ; Figure 3D). Awake ON cells had particularly high baseline  
156 activity (up to  $\sim 100$  Hz) and showed a prominent reduction in firing rates in response to light  
157 decrements (see Figure 3B for example). In contrast, due to this high baseline activity near  
158 saturation, many of them showed virtually no responses to light increments ( $N = 11/28$ ),  
159 except for a sharp rebound response to a full-contrast inversion ( $N = 8/11$ ; see Figures 2A  
160 and 3B for example). These ON cells had negative amplitudes in the curve fit (Figure 3E,  
161 green) with the same response phase as OFF cells (Figure 3F; see Figure 3A for a  
162 representative OFF cell's responses). This indicates that they primarily encode light  
163 decrements by decreasing firing from their high baseline firing rates ( $61 \pm 27$  Hz, mean  $\pm$   
164 standard deviation), rather than light increments by increasing firing as conventional ON cells  
165 do (Masland, 2012; Sanes and Masland, 2015; Baden et al., 2016; Jouty et al., 2018). We  
166 thus categorized these cells independently as an "OFF-suppressive" ON type (Figure 2G).  
167 This is a new response type likely emerged due to high baseline firing in awake mice. Indeed,  
168 such responses were barely observed in anesthetized animals (isoflurane, 1/298 cells; FMM,  
169 1/103 cells; Figure 2H,I) where the baseline firing rate was generally low (Figure 3D). As  
170 expected from previous *ex vivo* studies (Masland, 2012; Sanes and Masland, 2015; Baden et  
171 al., 2016; Jouty et al., 2018), anesthetized ON cells increased firing upon light increments (see  
172 Figure 3C for a representative response). Positive amplitudes in the curve fit (Figure 3E) with

173 an opposite response phase from OFF cells (Figure 3F) further support that these ON cells  
174 encode light increments. Taken together, these data suggest that the retinal coding depends  
175 on the baseline firing level of RGCs.

176 To characterize contrast sensitivity, we next examined the estimated response  
177 magnitude at 10% contrast from the sigmoid function used in the curve fit (Eq.(6)), and found  
178 no significant differences across the recording conditions (awake,  $4 \pm 10$  Hz, median  $\pm$   
179 interquartile range; isoflurane,  $6 \pm 13$  Hz; FMM,  $3 \pm 10$  Hz;  $p = 0.13$ , Kruskal-Wallis test).  
180 Nevertheless, the midpoint of the sigmoid was larger in awake cells ( $67 \pm 43\%$  contrast,  
181 median  $\pm$  interquartile range) than in anesthetized ones (isoflurane,  $45 \pm 44\%$ ,  $p < 0.001$ ,  
182 Mann-Whitney  $U$ -test; FMM,  $43 \pm 38\%$ ,  $p = 0.002$ ) so was the plateau (absolute value of peak  
183 evoked firing rate, Figure 3E; awake,  $52 \pm 68$  Hz, median  $\pm$  interquartile range; isoflurane,  
184  $37 \pm 33$  Hz,  $p = 0.03$ , Mann-Whitney  $U$ -test against awake data; FMM,  $35 \pm 34$  Hz;  $p =$   
185  $0.007$ ). This indicates a larger dynamic range in the awake condition, while contrast sensitivity  
186 itself remains largely unchanged.

187 Finally, we found a significant phase shift in the responses between the recording  
188 conditions (Figure 3F). This phase parameter in the curve fit represents the position of the  
189 response peak relative to the sinusoidal stimulus intensity patterns (see Methods for details),  
190 and we identified two clusters in each data set: the one with negative phase for ON cells  
191 (Figure 3F, blue) and the other with positive phase for OFF and OFF-suppressive ON cells  
192 (Figure 3F, red and green, respectively). ON/OFF cells were found in either cluster, depending  
193 on the relative strength of their responses to light increments versus light decrements (Figure  
194 3F, orange). In both clusters, we found that the phase was on average smallest for the awake  
195 condition ( $-2.4 \pm 0.3$  and  $1.5 \pm 0.3$  radian, respectively; mean  $\pm$  standard deviation; isoflurane,  
196  $-0.8 \pm 0.5$  and  $2.0 \pm 0.5$  radian;  $p < 0.001$  for both cases,  $t$ -test), while largest for the FMM  
197 anesthesia ( $-0.2 \pm 0.8$  and  $2.6 \pm 0.6$  radian;  $p < 0.001$  for both cases against corresponding  
198 isoflurane data). This implies that the response dynamics are faster in awake mice than those  
199 under anesthesia, especially with FMM.

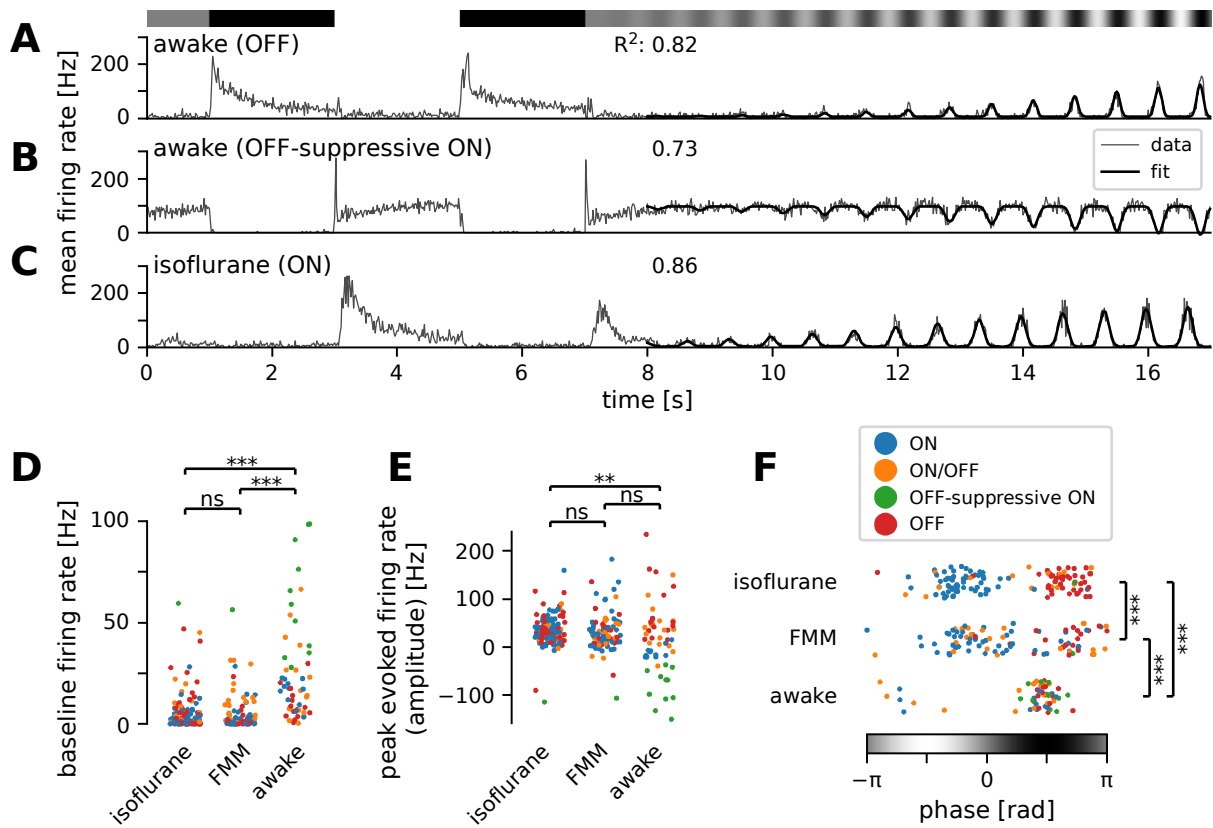

200

201 **Figure 3: Many ON retinal ganglion cells showed suppressive OFF responses in awake**  
 202 **condition.** A-C: Mean firing rate of representative cells in response to a sinusoidally-flickering  
 203 stimulus with increasing contrast in the awake (A, OFF; B, OFF-suppressive ON, the same  
 204 cell as in Figure 2A) or anesthetized conditions (C, ON). Overlaid with the peri-stimulus time  
 205 histogram (gray) is the model fit (black, Eq.(6) in Methods). The number on top indicates the  
 206 fit quality (explained variance  $R^2$  in Eq.(5)). D-F: population data of the model parameters (D,  
 207 baseline  $B$ ; E, amplitude  $A$ ; F, phase  $\phi$ ) across different conditions: isoflurane anesthesia  
 208 ( $N = 103$ ), FMM anesthesia ( $N = 92$ ) and awake ( $N = 51$ ). The sinusoidal stimulus pattern  
 209 relative to the response peak is also indicated at the bottom of F. Cell types are color-coded  
 210 as in Figure 2 (blue, ON; green, OFF-suppressive ON; red, OFF; orange, ON/OFF). Note high  
 211 baseline with negative amplitude and positive phase for the OFF-suppressive ON cells, which  
 212 were predominantly found in the awake condition: \*\*\*,  $p < 0.001$ ; \*\*,  $p < 0.01$ ; ns, non-  
 213 significant (D,  $U$ -test; E,  $F$ -test; F,  $t$ -test).

## 214 **Faster response kinetics in awake than in anesthetized mice**

215 To better characterize the kinetics of retinal output *in vivo*, we next analyzed the responses to  
216 full-field sinusoidal flickers at different temporal frequencies (Figure 4). In awake mice, most  
217 cells responded faithfully to all the stimulation frequencies we tested from 1.875 to 15 Hz (see  
218 Figure 4A for example). Some awake cells showed the largest responses to the 15 Hz  
219 stimulation (Figure 4A; curve fit in violet, Eq. (4)), suggesting that they were possibly tuned to  
220 even higher frequencies. In the anesthetized conditions, in contrast, retinal output responses  
221 typically followed the stimulation frequencies up to 7.5 Hz, but failed to do so at 15 Hz (see  
222 Figure 4B for example). For quantification, we fitted an even power of sine function to the  
223 responses (Eq.(4) in Methods) and set a threshold of the curve fit quality (defined as the  
224 explained variance; Eq.(5)) at 0.2 to select cells with robust responses (Figure 4C,D). In the  
225 awake condition, a larger number of cells responded well at medium frequencies (3.75 Hz,  
226 75%; 7.5Hz, 82%) than at a low frequency (1.875 Hz, 60%); and the majority of the awake  
227 cells remained responsive to a high frequency stimulus (15 Hz, 58%). Under anesthesia, in  
228 contrast, the fraction of responsive cells was the largest at a low frequency (1.875 Hz;  
229 isoflurane, 85%; FMM, 67%). Fewer cells responded robustly at faster flicker rates (3.75 Hz  
230 and 7.5 Hz; isoflurane, 73% and 65%, respectively; FMM, 63% and 59%), and only a small  
231 fraction of the anesthetized cells were able to follow the stimulation frequency at 15 Hz  
232 (isoflurane, 9%; FMM, 3%). Consistent with the phase analysis results described above  
233 (Figure 3F), these outcomes indicate that the retinal output dynamics are faster in awake  
234 animals than those under anesthesia, especially for FMM.

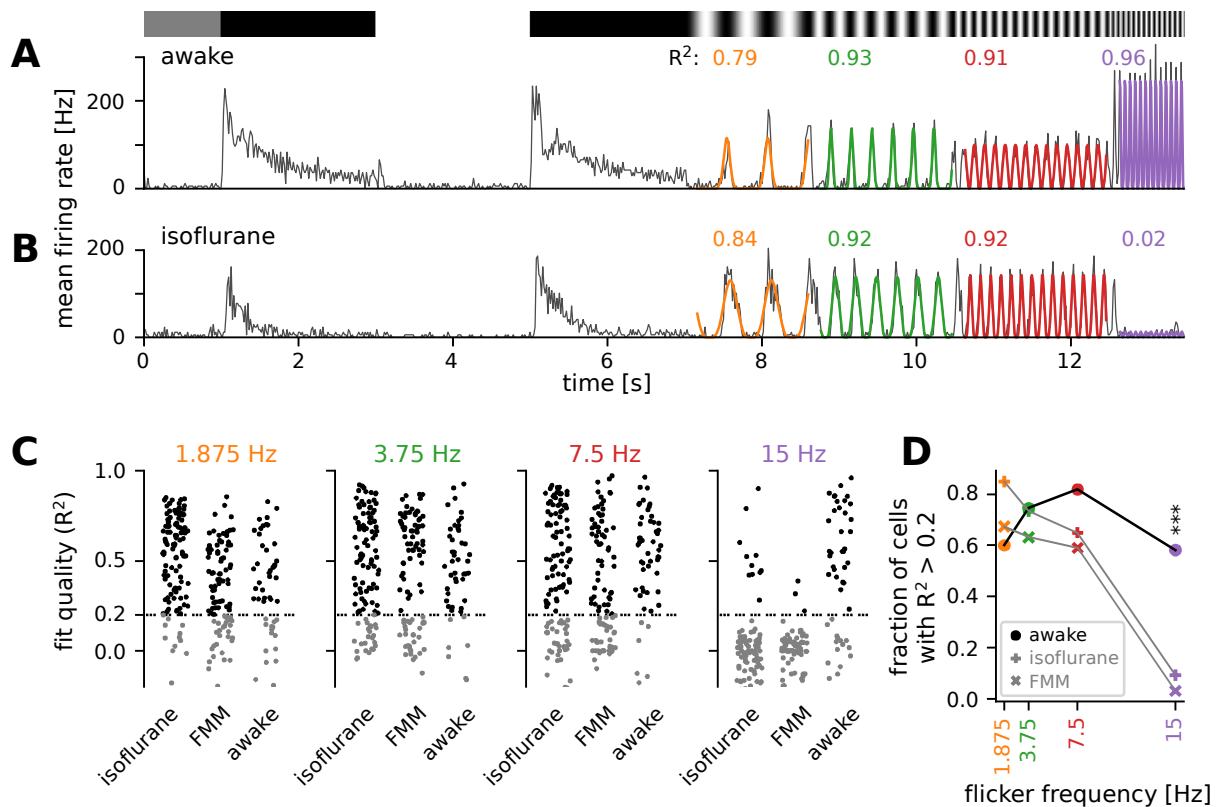

235

236 **Figure 4: Retinal output showed higher temporal frequency sensitivity in awake than in**  
237 **anesthetized mice.** A: Representative retinal output (black, mean firing rate over 10 trials) in  
238 an awake condition in response to full-field sinusoidally flickering stimuli at different temporal  
239 frequencies (1.875, 3.75, 7.5 and 15 Hz), following full-field contrast inversions. Overlaid is  
240 the curve fit (Eq.(4) in Methods) in different colors. The number on top is the explained  
241 variance of the curve fit ( $R^2$ , Eq. (5) in Methods) in corresponding colors, representing the fit  
242 quality. B: Representative retinal output responses under isoflurane anesthesia (shown in the  
243 same format as in A). C: Population data of the fit quality at four different stimulus frequencies  
244 in the awake ( $N = 51$ ) or anesthetized conditions (isoflurane,  $N = 103$ ; FMM,  $N = 92$ ). The fit  
245 quality threshold was set to be 0.2 (black,  $R^2 \geq 0.2$ ; gray,  $R^2 < 0.2$ ). D: Fraction of the cells  
246 with the fit quality above the threshold across different conditions (awake, black line with  
247 circles; isoflurane, gray line with vertical crosses; FMM, gray line with diagonal crosses),  
248 representing the frequency tuning of the retinal output at the population level. A significantly  
249 larger fraction of cells was responsive at 15 Hz in the awake condition than in the anesthetized  
250 conditions (\*\*\*,  $p < 0.001$  for both isoflurane and FMM; two-proportion z-test).

## 251 **Comparison of retinal output properties between *in vivo*** 252 **and *ex vivo***

253 We have thus far focused on the retinal output properties *in vivo*, and showed higher baseline  
254 firing rates (Figure 3) and faster response kinetics (Figure 4) in awake mice than in those  
255 under anesthesia. We next asked if RGC responses differ between *in vivo* and *ex vivo*  
256 conditions. This is a critical comparison because retinal physiology has been mostly studied  
257 and best characterized in an isolated preparation (Gollisch and Meister, 2010; Sanes and  
258 Masland, 2015), but little is known about it in awake animals (Weyand, 2007; Liang et al., 2018,  
259 2020; Schröder et al., 2020; Sibille et al., 2021). Here we exploited stimulus ensemble  
260 statistical techniques (“reverse correlation”; Meister et al., 1994; Chichilnisky, 2001) to  
261 systematically characterize the visual response properties and make a direct comparison  
262 across different recording conditions in the linear-nonlinear cascade model framework (see  
263 Methods for details). Specifically, using full-field white-noise stimuli, we analyzed 1) the linear  
264 temporal filter (Figure 5), estimated by the spike-triggered average (STA) stimulus, i.e., the  
265 mean stimulus that triggered spiking responses; and 2) the static nonlinear gain function  
266 (Figure 6), i.e., an instantaneous mapping of the STA output to the neural responses (Eq. (7)  
267 in Methods). Here we reanalyzed the existing data sets for *ex vivo* recordings (696 cells from  
268 18 isolated mouse retinas; Vlasiuk and Asari, 2021).

### 269 **Faster response kinetics in awake condition than *ex vivo***

270 We identified a good quality STA in more than two-thirds of the cells recorded *in vivo* (e.g.,  
271 Figure 5A). To compare the temporal dynamics of the STAs across different recording  
272 conditions, we used the following two measures: 1) the first peak latency of the STA estimated  
273 from a difference-of-Gaussian curve fit (Figure 5A); and 2) spectral peak frequency calculated  
274 by the Fourier transform of the fitted curve (Figure 5B). Consistent with the results measured  
275 by the flickering stimuli at different frequencies (Figure 4), we found faster kinetics in awake  
276 animals than in anesthetized ones (Figure 5C,D): i.e., significantly shorter peak latencies

277 (awake,  $35 \pm 12$  ms, mean  $\pm$  standard deviation; isoflurane,  $79 \pm 18$  ms,  $p < 0.001$ ,  $t$ -test;  
278 FMM,  $87 \pm 24$  ms,  $p < 0.001$ ; Figure 5C) and higher peak frequencies (awake,  $9.6 \pm 3.0$  Hz;  
279 isoflurane,  $4.6 \pm 1.6$  Hz,  $p < 0.001$ ; FMM,  $3.7 \pm 1.2$  Hz,  $p < 0.001$ ; Figure 5D). Interestingly,  
280 we identified that the *ex vivo* data lied in-between. The *ex vivo* STAs had significantly longer  
281 peak latencies ( $64 \pm 28$  ms,  $p < 0.001$ ) and lower peak frequencies ( $4.3 \pm 1.8$  Hz,  $p < 0.001$ )  
282 than the awake ones. In contrast, the peak latencies were significantly shorter in an isolated  
283 retinal preparation than in the anesthetized conditions (isoflurane,  $p < 0.001$ ; FMM,  $p < 0.001$ ),  
284 while the peak frequencies were comparable between these conditions (isoflurane,  $p = 0.7$ ;  
285 FMM,  $p = 0.052$ ).

286 We further analyzed the STA dynamics across different cell types. For clustering the  
287 STAs obtained in each recording condition, we used the principal component analysis (PCA;  
288 see Methods for details). As in previous *ex vivo* studies (Gollisch and Meister, 2008; Asari and  
289 Meister, 2014), the first two principal components accounted for most of the variance (78-86%,  
290 collectively), and the four quadrants of the PCA biplot generally represented distinct filter  
291 shapes, corresponding to monophasic OFF (mono-OFF), biphasic OFF (bi-OFF), monophasic  
292 ON (mono-ON), and biphasic ON (bi-ON) response types, respectively. In all recording  
293 conditions, no apparent cluster was found in this feature space, leading to a continuum of the  
294 STA shape patterns across populations (Figure 5E-H). Nevertheless, we identified two  
295 features that were different between *ex vivo* and *in vivo*, especially distinct in the awake  
296 condition. First, while the monophasic types were generally slower than the biphasic types,  
297 differences in the peak latencies were much larger in the *ex vivo* (Figure 5G; mono-ON  $83 \pm$   
298  $24$  ms versus bi-ON  $58 \pm 31$  ms,  $p < 0.001$ ,  $t$ -test; mono-OFF  $67 \pm 29$  ms versus bi-OFF  $48 \pm$   
299  $8$  ms,  $p < 0.001$ ) or anesthetized conditions (Figure 5E, isoflurane: mono-ON  $91 \pm 22$  ms, bi-  
300 ON  $67 \pm 6$  ms,  $p < 0.001$ ; mono-OFF  $89 \pm 14$  ms, bi-OFF  $68 \pm 8$  ms,  $p < 0.001$ ; Figure 5F,  
301 FMM: mono-ON  $97 \pm 30$  ms, bi-ON  $78 \pm 11$  ms,  $p = 0.051$ ; mono-OFF  $103 \pm 13$  ms, bi-OFF  
302  $70 \pm 11$  ms,  $p < 0.001$ ) than in the awake condition (Figure 5H; mono-ON  $40 \pm 7$  ms, bi-ON  
303  $30 \pm 13$  ms,  $p = 0.03$ ; mono-OFF  $39 \pm 7$  ms, bi-OFF  $34 \pm 14$  ms,  $p = 0.2$ ). Second, we found



304 that ON cells were significantly slower than OFF cells *ex vivo* (mono-ON versus mono-OFF,  
305  $p = 0.002$ ; bi-ON versus bi-OFF,  $p = 0.03$ ), but not *in vivo* ( $p > 0.2$  in all the conditions  
306 examined). Taken together, our results suggest that awake responses are faster and their  
307 kinetics are more similar across different cell types than *ex vivo* or anesthetized responses.

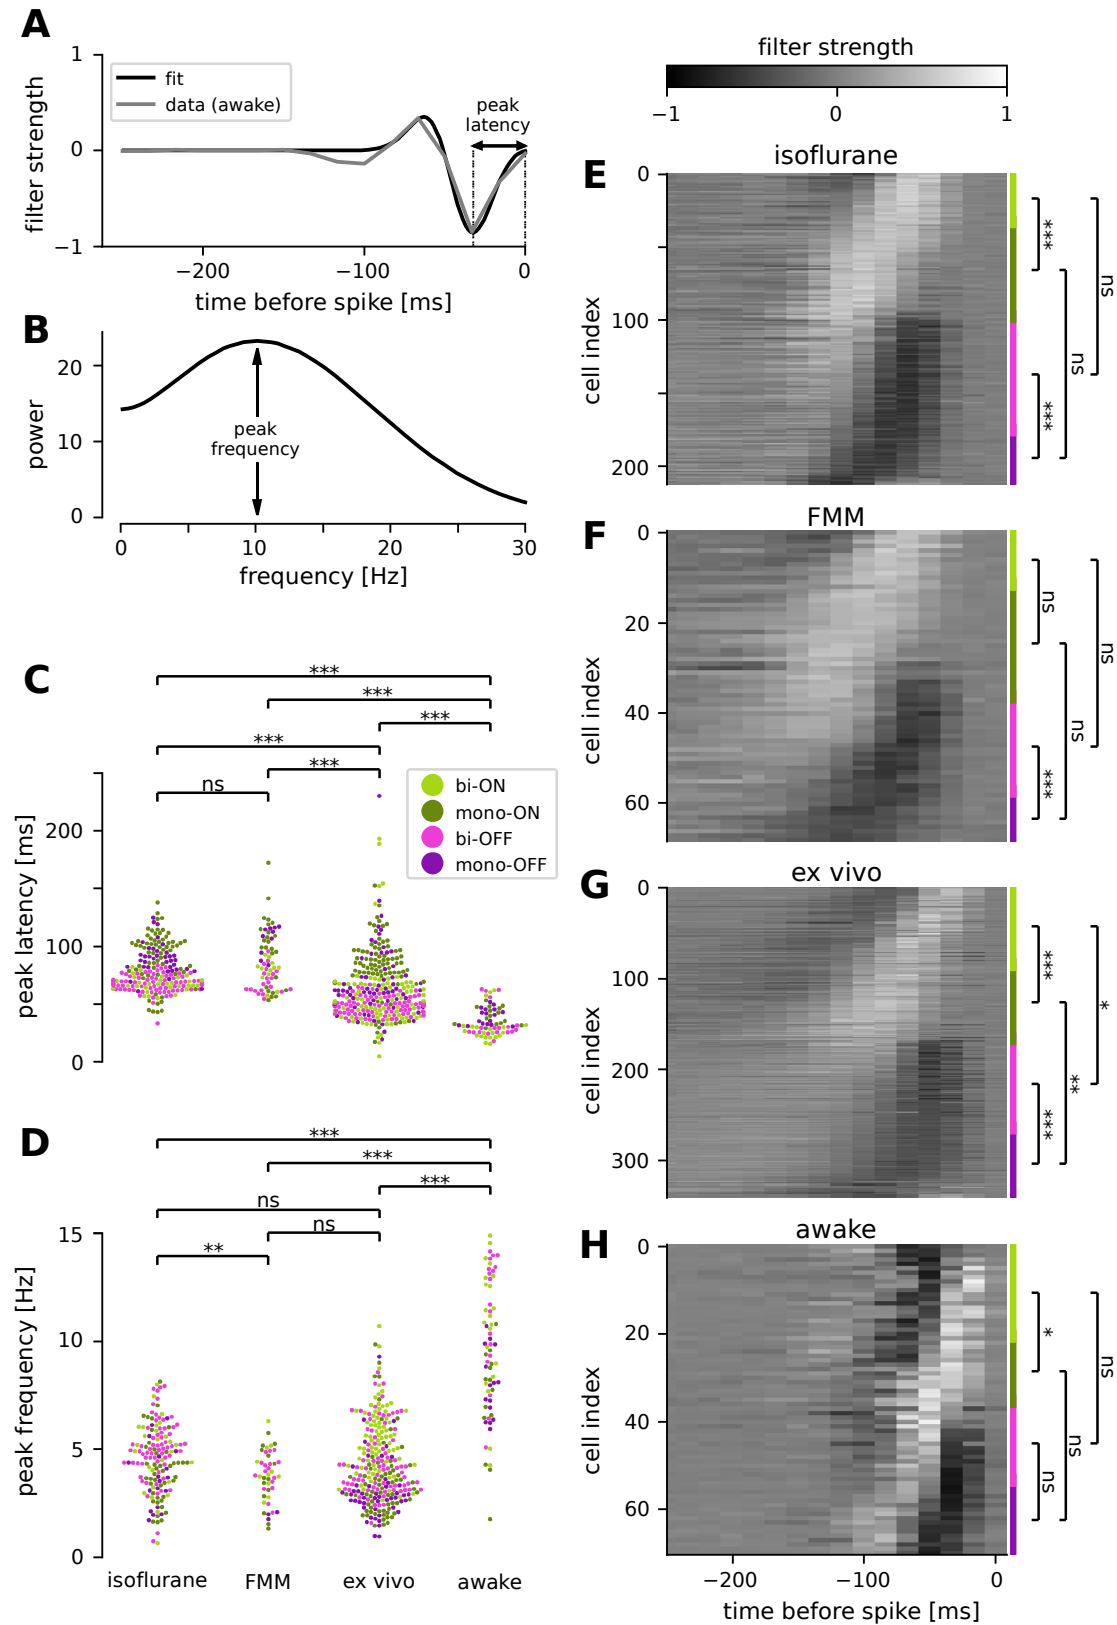

308 **Figure 5: Retinal ganglion cells showed faster response dynamics in awake condition**  
309 **than in anesthetized or ex vivo conditions.** *A:* Temporal filter of a representative awake cell  
310 (gray, spike-triggered average (STA) of the full-field randomly flickering stimulus) and a  
311 difference-of-Gaussian curve fit (black) for estimating the latency of the first peak. *B:* Power  
312 spectra of the example filter in *A*, based on the curve fit, for estimating the peak frequency.  
313 *C,D:* Population data of the peak latencies (*C*) and frequencies (*D*) across different conditions  
314 (light green, biphasic ON; dark green, monophasic ON; pink, biphasic OFF; violet, monophasic  
315 OFF). Here and thereafter, \*\*\*,  $p < 0.001$ ; \*\*,  $p < 0.01$ ; \*,  $p < 0.05$ ; ns, non-significant ( $t$ -test).  
316 The filter types were identified by the quadrants of the PCA biplot (see Methods for details).  
317 *E-H:* Population data of the temporal filters across different conditions: from top to bottom,  
318 isoflurane anesthesia (*E*,  $p < N = 213$ ), FMM anesthesia (*F*,  $N = 69$ ), *ex vivo* (*G*,  $N = 342$ )  
319 and awake (*H*,  $N = 71$ ). The four filter types are indicated on the right with corresponding  
320 colors.

321

## 322 **Higher spiking activity in awake condition than ex vivo**

323 How does a recording condition affect the firing properties of RGCs? The mean firing rate  
324 during the white-noise stimulus presentation was significantly higher in awake ( $35.0 \pm 27.3$  Hz;  
325 mean  $\pm$  standard deviation) than in all the other recording conditions (isoflurane,  $11.0 \pm 10.2$   
326 Hz; FMM,  $10.9 \pm 10.7$  Hz; *ex vivo*,  $6.9 \pm 6.6$  Hz; all with  $p < 0.001$ ,  $t$ -test in the logarithmic  
327 scale; Figure 6A). Importantly, this is not due to differences in the stimulus condition because  
328 the light intensity level was overall comparable between the recording setups (*in vivo*,  $\sim 16$   
329  $\text{mW}/\text{m}^2$  on average at the eye; *ex vivo*,  $\sim 18 \text{mW}/\text{m}^2$  on the isolated retina; see Methods for  
330 details).

331 For a further analysis, we examined the static nonlinear gain function of the recorded  
332 cells (Eq. (7) in Methods). This gain function accounts for nonlinearity associated with spike  
333 generation, such as spike threshold and firing rate saturation, and is generally well explained  
334 by a sigmoid function (see Figure 6B for example). For quantification, we assessed the neutral  
335 firing rate of the cells where the input to the gain function is zero, i.e., the firing rate in the  
336 presence of “neutral” stimuli that are orthogonal to the cell’s STA. Consistent with the results

337 on the baseline firing rates measured by the sinusoidally flickering stimuli (Figure 3), the  
338 neutral firing rate was significantly higher in the awake condition ( $29.5 \pm 25.4$  Hz, mean  $\pm$   
339 standard deviation) than those under anesthesia (isoflurane,  $7.6 \pm 8.4$  Hz,  $p < 0.001$ ,  $t$ -test on  
340 a log scale; FMM,  $7.5 \pm 9.3$  Hz,  $p < 0.001$ ; Figure 6C). We also found that the neutral firing  
341 rates *ex vivo* ( $5.5 \pm 7.1$  Hz) were as low as those in the anesthetized conditions (isoflurane,  
342  $p = 0.02$ ; FMM,  $p = 0.1$ ), and significantly lower than those in the awake condition ( $p < 0.001$ ).

343 We further identified two distinct features in the gain function properties between *ex*  
344 *vivo* and *in vivo* responses. First, ON cell types generally had a higher gain than OFF cell  
345 types *ex vivo* (Figure 6F), whereas such cell-type specific differences were not observed *in*  
346 *vivo* (isoflurane, Figure 6D; FMM, Figure 6E; awake, Figure 6G). Second, the midpoint of the  
347 sigmoid fitted to *ex vivo* responses ( $1.6 \pm 1.4$ , median  $\pm$  interquartile range) was significantly  
348 higher than that for *in vivo* responses (isoflurane,  $1.1 \pm 0.9$ ; FMM,  $1.1 \pm 0.8$ ; awake,  $0.9 \pm 1.2$ ;  
349 all with  $p < 0.001$ , Mann-Whitney  $U$ -test; Figure 6H). Taken together with the outcomes  
350 obtained with the sinusoidally flickering stimulus (Figure 3), this suggests that *in vivo*  
351 responses are more linearized to cover a larger dynamic range, especially in the awake  
352 condition due to high neutral responses (Figure 6G).

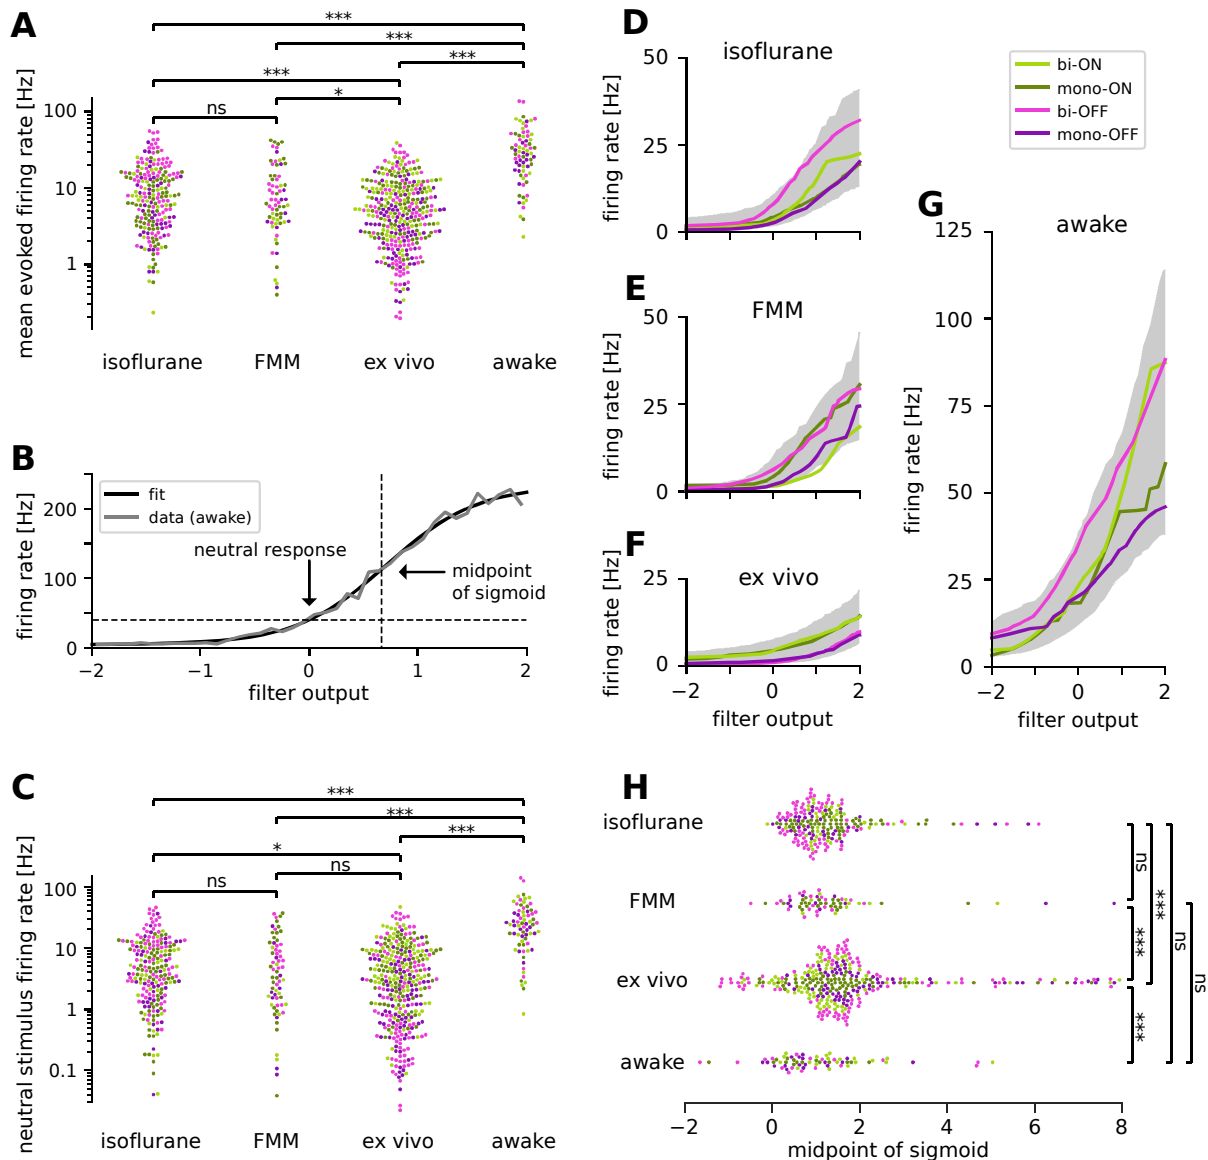

353  
 354 **Figure 6: Retinal ganglion cells showed higher firing activity in awake condition than in**  
 355 **anesthetized or ex vivo conditions.** Cell types are color-coded as in Figure 5 (light green,  
 356 biphasic ON; dark green, monophasic ON; pink, biphasic OFF; violet, monophasic OFF). **A:**  
 357 Population data of the mean firing rates during the stimulus presentation period in four different  
 358 recording conditions (isoflurane, FMM, ex vivo, and awake): \*\*\*,  $p < 0.001$ ; \*\*,  $p < 0.01$ ; \*,  $p <$   
 359  $0.05$ ; ns, non-significant ( $t$ -test on the logarithm of firing rates). **B:** Static nonlinear gain function  
 360 of a representative awake cell (the same one as in Figure 5A), estimated by the stimulus  
 361 ensemble statistical techniques applied to the responses to a full-field randomly flickering  
 362 stimulus (gray, Eq.(7) in Methods; black, sigmoid curve fit with the midpoint at 0.71). Note a  
 363 high neutral stimulus response (40 Hz) defined as the firing rate at zero filter output (i.e., in  
 364 the presence of stimuli orthogonal to the cell's STA). **C:** Population data of the neutral stimulus  
 365 responses in each recording condition (in the same format as in A). **D-G:** Population data of  
 366 the static nonlinear gain function (median for each cell type in corresponding colors; gray,  
 367 interquartile range of all cells) across different conditions: isoflurane anesthesia (D,  $N = 213$ ),  
 368 FMM anesthesia (E,  $N = 69$ ), ex vivo (F,  $N = 342$ ), and awake condition (G,  $N = 71$ ). **H:**  
 369 Population data of the midpoint of the sigmoid nonlinearity in each recording condition: \*\*\*,  
 370  $p < 0.001$ ; Mann-Whitney  $U$ -test.

## 371 Discussion

372 Here we established optic tract recordings in head-fixed mice (Figure 1) and systematically  
373 analyzed the retinal output properties *in vivo* using a standardized set of visual stimuli for  
374 characterizing retinal functions (Baden et al., 2016; Jouty et al., 2018). We found that awake  
375 response properties were overall similar to those under isoflurane or FMM anesthesia (Figures  
376 2-4) or *ex vivo* (Figures 5 and 6); however, we identified two distinct features in the awake  
377 condition: higher firing rates (Figures 3 and 6) and faster response dynamics (Figures 4 and  
378 5). The change in the kinetics likely arose as a direct consequence of the high baseline activity  
379 in awake animals. When cells are on average more depolarized, it is faster to reach the spike  
380 threshold upon stimulation, hence leading to a shorter response latency (Zohar et al., 2011).  
381 High firing activity in awake animals has been widely observed in many brain areas across  
382 species (Greenberg et al., 2008; Sellers et al., 2015; Durand et al., 2016; Wright et al., 2017;  
383 De Franceschi and Solomon, 2018; Chen and Song, 2019). Therefore, the retinal response  
384 characteristics we observed *in vivo* could be a general feature of the brain in an awake state.

385 In awake animals, both the baseline and visually-evoked firing rates of RGCs were  
386 much higher—on average by ~20 Hz—than in those under anesthesia or in an isolated  
387 preparation (Figures 3 and 6). As a result, many awake ON cells showed OFF-suppressive  
388 responses, a new response type observed only in those cells with high baseline firing rates  
389 (~60 Hz). Here we classified these cells separately from the other ON cells in our clustering  
390 analysis (Figure 2); however, it is unlikely that they form a distinct “cell type” in the retina.  
391 Instead, these cells likely belong to a known cell type, and altered their response properties  
392 due to an increased baseline activity in the awake condition. Possible candidate cell types are:  
393 transient ON alpha cells (although they have a low baseline firing rate *ex vivo*; Krieger et al.,  
394 2017), ON contrast suppressive cells (although a sharp rebound response is missing in the  
395 calcium dynamics *ex vivo*; Baden et al., 2016), or suppressed-by-contrast cells (although their  
396 high baseline activity is suppressed by both ON and OFF stimuli; Mastronarde, 1985; Tien et

397 al., 2015; Jacoby and Schwartz, 2018). It is interesting to identify the exact cell type of these  
398 RGCs and further characterize their function *in vivo* in future studies.

399         What are the mechanisms underlying such differences between *in vivo* and *ex vivo*  
400 retinal responses? One possibility is the difference in the physiological states of the retina.  
401 Even if *ex vivo* recordings are made under a proper temperature using a perfusion medium  
402 specifically formulated to support isolated retinal tissues (Ames and Nesbett, 1981), there are  
403 certain unavoidable differences to the physiological condition *in vivo*. In particular, the retinal  
404 pigment epithelium, a key player for the visual cycle and spatial buffering of ions, is often  
405 removed in an isolated retinal preparation. A lack of retinal supply can then alter the  
406 physiological states of the retinal neurons, potentially leading to a change in their visual  
407 response properties.

408         Differences in the input stimulus properties, in contrast, cannot explain our results,  
409 even though retinal responses depend a lot on stimulus conditions. For example, the higher  
410 the light intensity level is, the higher the temporal frequency sensitivity becomes for *ex vivo*  
411 RGC responses (threshold at around 20-30 Hz; Wang et al., 2011) and so does the critical  
412 flicker-fusion frequency at the behavioral level (15-40 Hz; Umino et al., 2018; Nomura et al.,  
413 2019). Response latencies depend also on the spatial patterns of stimuli as well as their  
414 contrast (Bolz et al., 1982; Baccus and Meister, 2002; Sagdullaev and McCall, 2005; Pearson  
415 and Kerschensteiner, 2015; Tikidji-Hamburyan et al., 2015). Here we used full-field stimuli at  
416 slightly lower light intensity level for *in vivo* recordings than for *ex vivo* ones (see Methods for  
417 details). Therefore, higher baseline activity and faster dynamics observed in awake animals  
418 cannot be simply attributed to the difference in the stimulus conditions.

419         Finally, when comparing retinal responses across different studies, one cannot ignore  
420 a possible effect of sampling bias because visual response dynamics are cell-type specific  
421 (van Wyk et al., 2009; Krieger et al., 2017; Ravi et al., 2018; Tengölics et al., 2019). In an  
422 extreme case, delayed ON cells have the response latency slower than other RGC types by  
423 hundreds of milliseconds in an isolated mouse retina (Mani and Schwartz, 2017). Response

424 dynamics are also species-specific. For example, ON RGCs show higher baseline activity and  
425 faster responses than OFF cells in the macaque (Chichilnisky and Kalmar, 2002) and guinea  
426 pig (Zaghloul et al., 2003) retinas, whereas slower in the salamander retina (Gollisch and  
427 Meister, 2008), and such asymmetry between ON and OFF dynamics is pathway-specific in  
428 the rat retina (Ravi et al., 2018). Moreover, kinetics can vary even for the same cell type,  
429 depending on the retinal location (Warwick et al., 2018) or light-adaptation state (Chang and  
430 He, 2014; Tengölics et al., 2019). Sampling bias can then skew the results in many different  
431 ways. In this study, however, we recorded a wide variety of cell types (Figure 2), and no  
432 apparent difference was found in the STA distributions across different recording conditions  
433 (Figure 5). We thus expect that the effects of sampling bias should be minimal on the observed  
434 differences between *in vivo* and *ex vivo* retinal response characteristics.

435 Taken together, our findings indicate that clear differences exist in retinal physiology  
436 between *in vivo* and *ex vivo*. This highlights the importance of studying retinal function *in vivo*,  
437 especially in the awake condition.

## 438 **Implications on retinal coding *in vivo***

439 The optic nerve fiber forms an information bottleneck in the early visual system. The human  
440 retina, for example, contains  $\sim 10^8$  input neurons (photoreceptors) but only  $\sim 10^6$  output  
441 neurons (RGCs) whose axons make up the optic nerve (Masland, 2012; Sanes and Masland,  
442 2015). The retina is then expected to optimize the channel capacity by compressing the visual  
443 information as much as possible and conveying signals to the brain using as few spikes as  
444 possible (Attneave, 1954; Barlow and Rosenblith, 1961; Laughlin, 2001). Such an efficient  
445 coding hypothesis is well supported by both *ex vivo* experimental data and theoretical  
446 analyses. Under *ex vivo* conditions, RGCs are silent most of the time and fire spikes at high  
447 rates only when their selective stimulus features are presented (Gollisch and Meister, 2010;  
448 Baden et al., 2016; Jouty et al., 2018). This sparse RGC response, ensured by low  
449 spontaneous activity and strong nonlinearity (Pitkow and Meister, 2012), helps achieve high



450 efficiency and low redundancy in the visual representation of the retina (Doi et al., 2012).  
451 Furthermore, efficient coding principles can explain various physiological properties of the  
452 retina, such as separation of retinal outputs into multiple cell types (Gjorgjieva et al., 2019).

453         The retinal output characteristics we observed *in vivo*, however, provide a completely  
454 different view on the retinal code. First, unlike *ex vivo* conditions, RGCs in awake mice showed  
455 a high baseline activity with more linearized responses (Figures 3 and 6). Consequently, many  
456 awake ON cells primarily encoded light decrements by suppression from high baseline, rather  
457 than light increments by activation from low baseline. These cells convey the same information  
458 as conventional ON cells do—the more spikes, the higher light intensity—but using much more  
459 spikes. Thus, the amount of information transmitted per spike is much lower *in vivo* than *ex*  
460 *vivo*, violating the efficient coding principles. Second, we found less variability in the visual  
461 response dynamics across different RGC types *in vivo* (Figure 5E-H). This suggests that  
462 temporal coding framework based on spike timing patterns may not be readily applicable *in*  
463 *vivo*. Latency coding, for example, will not work well *in vivo* as it requires noticeable differences  
464 in the response latencies between two or more channels, such as ON and OFF pathways  
465 converging onto ON-OFF RGCs (Gollisch and Meister, 2008). Our results thus favor dense  
466 rate coding in the retina, rather than sparse temporal coding.

467         What are the advantages of such energy-inefficient retinal coding? As shown in our  
468 awake recordings, one can gain faster response kinetics (Figure 5) and wider bandwidths  
469 (Figure 6). In addition, redundancy in the dense code helps transmit signals accurately even  
470 with intrinsically noisy spike trains. These features are all highly beneficial from a behavioral  
471 viewpoint—e.g., to detect predators robustly and promptly—and thus worth achieving for  
472 survival at an expense of energy cost. Interestingly, dense coding can be a general feature of  
473 early sensory processing, as suggested by high baseline firing in vestibular and cochlear  
474 nuclei (Fuchs and Kimm, 1975; Rhode and Smith, 1986; Warchol and Dallos, 1990; Beranek  
475 and Cullen, 2007), tonic activity in hair cells (Sachs and Abbas, 1974; Wu et al., 2016), and  
476 dark current in vertebrate photoreceptors (Hagins et al., 1970; Okawa et al., 2008). In fact, the

477 energy cost of dense retinal coding may not be so problematic with a relatively small number  
478 of neurons, as opposed to the total energy required for operating  $\sim 10^9$  neurons in the cortex  
479 where sparse coding has certain advantages from the viewpoints of both energy efficiency  
480 and sensory processing (Olshausen and Field, 1996; Asari et al., 2006). Further  
481 characterizations of the retinal code *in vivo* will be needed to clarify what exactly the eye tells  
482 the brain.

## 483 **Effects of anesthetics in early visual system**

484 Anesthetics generally lower the excitability of nerve cells: e.g., isoflurane acts on the gamma-  
485 aminobutyric acid (GABA) type A receptors to silence the brain (Jenkins et al., 1999). It thus  
486 makes sense that the retinal outputs were reduced under anesthesia (Figures 3 and 6) and  
487 showed slower dynamics (Figures 4 and 5) than in awake animals. It is, however, difficult to  
488 generalize the effects of anesthesia because multiple mechanisms of action are involved,  
489 exerting complex effects on the sensory systems in anesthetic- and dose-dependent manners  
490 (Populin, 2005). For example, while visual cortical responses are reduced under anesthesia  
491 (Haider et al., 2013; Vaiceliunaite et al., 2013), auditory responses are enhanced (Raz et al.,  
492 2014; Sellers et al., 2015) and the response latency becomes shorter in the auditory pathway  
493 (Ter-Mikaelian et al., 2007).

494 Our results are nevertheless consistent with previous studies on the effects of  
495 anesthesia in the early visual system. Specifically, anesthesia reduces the overall activity of  
496 both SC and dLGN neurons, and leads to multiple changes in temporal processing of these  
497 two major retinorecipient areas, such as reduced sensitivity to high temporal frequencies and  
498 longer response latencies (Zhao et al., 2014; Durand et al., 2016; De Franceschi and Solomon,  
499 2018). While different anesthetics were used in these studies (urethane as opposed to  
500 isoflurane and FMM), our consistent findings suggest that such changes in the response  
501 dynamics arise largely from the retina. In contrast, the effects of anesthesia on spatial  
502 response properties seem more complex. While spatial processing remains largely intact in

503 dLGN (Durand et al., 2016), lower contrast sensitivity and larger receptive field sizes were  
504 reported in SC under urethane anesthesia (De Franceschi and Solomon, 2018). Moreover,  
505 SC neurons show increased orientation selectivity under isoflurane anesthesia (Kasai and Isa,  
506 2021). Here we also found a larger fraction of motion sensitive cells under both isoflurane and  
507 FMM anesthesia (Figure 2D-F). Due to confounding effects of eye movements in awake  
508 animals, however, we were not able to fully analyze spatial response properties of retinal  
509 outputs *in vivo*. It is a future challenge to develop algorithms to compensate for the eye motion  
510 at a spatial resolution well below the RGC receptive field size (as small as 3 degrees; Zhang  
511 et al., 2012) for fully characterizing spatiotemporal processing of the retina *in vivo*.

## 512 **Materials and Methods**

513 No statistical method was used to predetermine the sample size. The significance level was  
514 0.05 (with Bonferroni correction where appropriate) in all analyses unless noted otherwise. All  
515 experiments were performed under the license 233/2017-PR from the Italian Ministry of Health.  
516 The data analyses were done in Python.

## 517 **Animals**

518 A total of 43 female C57BL/6J mice were used (chronic, 3; acute, 23; failures, 17, including  
519 10 initial unsuccessful attempts to record from the optic chiasm) at around three months of  
520 age at the time of the surgery. Mice were kept on a 12-h light / 12-h dark cycle and given water  
521 and food *ad libitum*. After the chronic implantation of electrodes, the animals were kept single-  
522 housed.

## 523 **Chronic recordings**

524 For implanting electrodes, animals were anesthetized (induction, 4% isoflurane; maintenance,  
525 1-2%) and placed inside a stereotaxic apparatus (Neurostar). Throughout the surgery,  
526 temperature was maintained at 37°C using a heating pad (Supertech Physiological), and eye  
527 ointment (VitA-POS) was used to prevent the eyes from drying. After positioning the mouse

528 head, the scalp skin was disinfected (Betadine) and removed with scissors. Soft tissue was  
529 removed from the skull surface with a round scalpel, and ethanol and acetone were applied to  
530 the skull for disinfection and removal of any residual compounds. The skull was glazed with a  
531 drop of cyanoacrylate adhesive (Loctite 401) to secure in place the surrounding skin, and then  
532 registered in the stereotaxic controller software (NeuroStar). A dental drill (WPI) was used to  
533 leave three marks on the skull to label the entry point for targeting the optic tract: [-1.34, +1.87,  
534 +4.74], [-1.70, +1.87, +4.74], and [-1.82, +2.35, +4.07] in [Anterior-Posterior, Medial-Lateral,  
535 Dorsal-Ventral] coordinates, respectively. A hole was drilled for a reference silver wire (A-M  
536 Systems) above the cerebellum, and the wire was inserted sideways to avoid excessive brain  
537 damage. After covering the hole and wire with Vaseline, the wire was attached to the skull  
538 with cyanoacrylate adhesive and dental cement (Paladur, PALA). Subsequently, a custom-  
539 designed titanium head-plate was attached to the skull with dental cement, followed by a  
540 craniotomy (diameter, 1-2 mm) and durotomy. A chronic silicone probe (Buzsaki32L,  
541 NeuroNexus) was then inserted with the stereotaxic controller (75  $\mu\text{m}/\text{min}$ ) first to a depth of  
542 2 mm, retracted by 1 mm to release pressure created by the initial brain entry, and then to a  
543 depth of 4.5 mm from the skull surface. After reaching the desired depth, a microdrive (dDrive,  
544 NeuroNexus) was attached to the skull with dental cement, and the probe was removed from  
545 its mount and covered with a protective cap. The cables and connectors were cemented to  
546 the cap and covered with paraffin film (Bemis, Parafilm) to prevent the mouse from damaging  
547 the implant.

548 After the surgery, the animals were kept on a heating pad (Sera, Thermo comfort mat  
549 S) until they recovered from anesthesia. During the next four days, the mice received an anti-  
550 inflammatory/antibiotic cocktail (Rimadyl/Baytril; 0.5 mg/mL each, 0.01 mL/g). The antibiotic  
551 (Baytril) was given for an additional three days through drinking water (0.17 mg/mL).

552 After a recovery period of five days, the mice were placed on a custom-made rotary  
553 treadmill (diameter, 20 cm) with their head fixed for the recordings (at most two times a day,  
554 each for <2 hours). During the initial sessions, we moved the probe until visual responses

555 were observed (Figure 1A-D). The electrophysiology data were recorded at 30 kHz from each  
556 recording site (SmartBox, NeuroNexus) together with synchronization pulses from the visual  
557 stimulation device (see below). In total, we made 17 recording sessions from 3 out of 6 animals,  
558 where up to 10 cells were simultaneously recorded in each session ( $4.4 \pm 2.4$  cells/session,  
559 mean  $\pm$  standard deviation).

560 After all the recording sessions, the electrode position was verified histologically (e.g.,  
561 Figure 1E). The mice were anesthetized (2.5% Avertin, 16  $\mu$ L/g, intraperitoneal injection) and  
562 perfused with paraformaldehyde (PFA; 4% in phosphate buffer solution). The animal's head  
563 with the electrode left in position was collected without the skull base, and stored in fixative  
564 solution (4% PFA) at 4°C for at least four days. This helped the brain tissue harden around  
565 the silicon probe, hence leaving a visible mark after removing the probe. Harvested brain  
566 tissue was then coronally sliced with a vibratome (Leica, VT1000S; thickness, 150  $\mu$ m) and  
567 imaged under a bright-field microscope (Leica, LMD7000).

## 568 **Acute recordings**

569 Animals were anesthetized and placed inside a stereotaxic apparatus with a heating pad as  
570 described above. A contact lens (diameter, 3 mm; Ocuscience) was used for the target eye to  
571 prevent it from drying. The scalp was removed, registered in the stereotaxic controller, and  
572 the three entry points for targeting the optic tract were marked with the stereotaxic drill. A well  
573 was made with dental cement around the marks later to hold saline solution on top of the brain.  
574 After a craniotomy (diameter, 2 mm), an acute silicone probe (Buzsaki32L, Neuronexus)  
575 coated with a fluorescent dye (Dil stain, Invitrogen, D282) was slowly inserted into the brain  
576 (100  $\mu$ m/min) with a micromanipulator (Sensapex, SMX) attached to the stereotaxic apparatus.  
577 While approaching the target depth, visual stimuli were presented (full-field contrast-inverting  
578 stimulus at 0.5 Hz; see below). The probe was moved until a maximum number of visually  
579 responsive cells were seen at once (up to 20 cells;  $7.7 \pm 5.3$  cells/session, mean  $\pm$  standard  
580 deviation; 52 sessions in total from 23 out of 27 animals).

581 Throughout the recordings, the mouse was kept under anesthesia with 1% isoflurane.  
582 The depth of anesthesia was monitored by the breathing rate (~1 breath/s). Alternatively, we  
583 used a cocktail of fentanyl, medetomidine and midazolam (FMM) during the recordings. In this  
584 case, once the electrode was in position, an FMM solution (fentanyl, 0.05 mg/kg;  
585 medetomidine, 0.5 mg/kg; midazolam, 5 mg/kg; in 0.9% NaCl saline) was intraperitoneally  
586 administered, and the isoflurane dose was progressively decreased to 0%. Buprenorphine  
587 (0.1 mg/kg) was injected 20 minutes after the termination of isoflurane, and the recording  
588 session was initiated 10 minutes after the buprenorphine injection. The depth of anesthesia  
589 was monitored through the heart rate (below around 300 beats per minute) and supplemental  
590 FMM anesthesia was provided when required. The electrophysiology data and the visual  
591 stimulation signals were recorded at 30 kHz/electrode (SmartBox, NeuroNexus).

592 At the end of the recording session, the electrode location was verified histologically.  
593 After retracting the silicone probe, the animal was perfused as described above. The brain  
594 tissue was harvested and post-fixed overnight in 4% PFA at 4°C. Coronal sections of the brain  
595 tissue (thickness, 150  $\mu$ m) were then examined under a fluorescence microscope (Leica,  
596 LMD7000 with N2.1 filter cube) to visualize the trace left by the Dil stain on the probe.

## 597 **Visual stimulation**

598 Visual stimuli were presented by a custom gamma-corrected digital light processing (DLP)  
599 device (Texas Instruments, DLPDLCR3010EVM-LC) where the original green and red light-  
600 emitting diodes (LEDs) were replaced with ultra-violet (UV; 365 nm; LZ1-00UV00, LED  
601 Engine) and infrared (IR; 950 nm; SFH 4725S, Osram) LEDs, respectively. The UV and blue  
602 (465 nm) lights were projected onto a spherical screen (radius, 20 cm) with UV-reflective white  
603 paint (waterfowl store) placed ~20 cm to the contralateral side of an animal's eye from the  
604 implanted probe (Figure 1A), whereas the IR light was used as synchronization pulses,  
605 recorded via a photodiode with a custom transimpedance amplifier. The visual stimuli (1280-  
606 by-720 pixels; frame rate, 60 Hz) covered 73° in azimuth and 44° in altitude from the mouse

607 eye position (Figure 1B). The maximum light intensity at the eye position was 15.4 mW/m<sup>2</sup> and  
608 15.9 mW/m<sup>2</sup> for the UV and blue LEDs, respectively, leading to mesopic to photopic conditions.

609 Using this DLP setup and QDSpy software (Franke et al., 2019), we presented the  
610 following set of visual stimuli: a randomly flickering full-field stimulus (5 min; 60 Hz), a moving  
611 grating stimulus (spatial frequencies of square waves, 3° or 20°; moving speed, 7.5°/s or 15°/s,  
612 in eight different directions), a full-field stimulus whose intensity followed a sinusoid (1.5 Hz)  
613 with a linearly increasing amplitude from 0% to 100% contrast over 10 s (10 trials; Figure 3),  
614 and a full-field sinusoidally flickering stimulus (maximum contrast) at different temporal  
615 frequencies (1.875, 3.75 and 7.5 Hz, each for 2 s; 15 Hz for 1 s; 10 trials; Figure 4). The last  
616 two full-field stimuli were preceded by a sequence of “OFF-ON-OFF” stimulation at maximum  
617 contrast (full-field contrast inversion; 2 s each) and interleaved by a 1-s-long gray screen  
618 across trials. These stimuli were equivalent to those used for differentiating ~30 RGC types  
619 *ex vivo* (Baden et al., 2016; Jouty et al., 2018).

## 620 **Data analysis**

621 Spike sorting was performed with SpykingCircus (Yger et al., 2018) for semi-automatic cluster  
622 detection and Phy (Rossant, 2020) for data curation. In total, we obtained 75 cells for chronic  
623 recordings, and 298 and 103 cells for acute recordings under isoflurane and FMM anesthesia,  
624 respectively. Not all cells responded to the entire stimulus set, but cells responding to any of  
625 the presented stimuli were included in the analysis. For *ex vivo* recordings, we reanalyzed the  
626 data sets in Vlasiuk and Asari (2021). Specifically, the *ex vivo* data sets included the activity  
627 of 696 cells recorded with a multi-electrode array (from 18 isolated mouse retinas) in response  
628 to a randomly flickering full-field visual stimulus projected from a gamma-corrected cathode-  
629 ray tube monitor (frame rate, 100 Hz) or a DLP device (60 Hz). The maximum light intensity  
630 on the isolated retinas was 36 mW/m<sup>2</sup> (Vlasiuk and Asari, 2021).



## 631 **Response quality**

632 We assessed the cell's response quality based on the trial-to-trial reliability of the response  
633  $r(t)$  during the "ON-OFF" period of the OFF-ON-OFF stimulus sequence (see Figure 2A for  
634 example). Specifically, the signal-to-noise ratio was calculated for each cell as follows:

$$635 \quad \text{SNR} = \frac{\text{var}[\langle r(t) \rangle]_t}{\langle \text{var}[r(t)]_t \rangle} \quad (1)$$

636 where  $\langle \cdot \rangle$  indicates the mean over trials, and  $\text{var}[\cdot]_t$  the variance over time  $t$  (bin size,  $\Delta t =$   
637 16.6 ms). We set a threshold at 0.15 to select reliably responsive cells for further analyses  
638 (Figure 2B).

## 639 **Response polarity**

640 To characterize the cell's preference to stimulus polarity, we defined an ON-OFF index using  
641 the responses to the full-field contrast inversion:

$$642 \quad \text{ON-OFF index} = \frac{r_{\text{ON}} - r_{\text{OFF}}}{r_{\text{ON}} + r_{\text{OFF}}}, \quad (2)$$

643 where  $r_{\text{ON}}$  and  $r_{\text{OFF}}$  are the mean firing rate during the ON and the second OFF periods of the  
644 OFF-ON-OFF stimulus sequence, respectively. Positive and negative ON-OFF index values  
645 indicate stronger responses to ON and OFF stimuli, respectively (Figure 2C).

## 646 **Motion sensitivity**

647 Direction-selectivity (DS) and orientation-selectivity (OS) indices were calculated by projecting  
648 the responses to the moving grating stimuli onto a complex exponential:

$$649 \quad \text{DS or OS index} = \left\| \frac{\sum_k e^{-i\alpha\omega_k} \cdot r_k}{\sum_k r_k} \right\|, \quad (3)$$

650 where  $\omega_k$  and  $r_k$  are the angle of the  $k$ -th direction and the cell's corresponding responses,  
651 respectively; and  $\alpha = 1$  and  $2$  for the DS and OS indices, respectively. Cells were considered  
652 motion-sensitive when at least one of these indices was higher than 0.15 and  $p <$   
653 0.2 calculated by bootstrap methods (1,000 repetitions; Figure 2D-F).

## 654 **Temporal frequency sensitivity**

655 Temporal frequency sensitivity was assessed by fitting an even power of sine function to the  
656 responses to the full-field sinusoidally flickering stimulus at different frequencies  $h$  (1.875, 3.75,  
657 7.5, or 15 Hz; Figure 4):

$$658 \quad s(t) = A \cdot \sin^q \left( \pi h t - \frac{\phi}{2} \right) + B, \quad (4)$$

659 where  $A$  and  $B \geq 0$  are the response amplitude and baseline activity, respectively; and  $q = 2n$   
660 with  $n \in \mathbb{N}^+$  is the exponent of the sine function. The phase  $\phi \in [-\pi, \pi)$  indicates the relative  
661 position between the response peak and the sinusoidal stimulus patterns. For example,  $\phi =$   
662  $-\pi/2$  and  $\pi/2$  are obtained if the response reaches its peak when the stimulus is brightest  
663 and darkest, respectively.

664 The fit quality was then assessed by the explained variance:

$$665 \quad R^2 = 1 - \frac{\text{var}[\text{Data} - \text{Fit}]}{\text{var}[\text{Data}]}. \quad (5)$$

666 We set a threshold at 0.2 to select cells with a good fit hence responsive to the stimulus (Figure  
667 4C), and compared the proportions of the responsive cells across different recording  
668 conditions (two-proportion  $z$ -test; Figure 4D).

## 669 **Contrast sensitivity**

670 We used a sigmoid-weighted sine-power function to characterize the responses to the  
671 flickering stimulus ( $h = 1.5$  Hz) with increasing contrast (Figure 3):

$$672 \quad S(t) = \frac{A}{1 + e^{-\lambda(t-t_0)}} \cdot \sin^q \left( \pi h t - \frac{\phi}{2} \right) + B, \quad (6)$$

673 where  $t_0$  and  $\lambda > 0$  are the midpoint and the steepness of the sigmoid, respectively; and the  
674 other free parameters are the same as  $s(t)$  in Eq.(4). The fitted parameter values were then  
675 compared across different recording conditions (Mann-Whitney  $U$ -test for the baseline  $B$ ,  
676 Figure 3D; Levene  $F$ -test for the amplitude  $A$ , Figure 3E; and  $t$ -test for the phase  $\phi$ , Figure

677 3F). As a measure of contrast sensitivity, we used an estimated response magnitude at 10%  
678 contrast from Eq.(6).

## 679 **Temporal filters and static nonlinear gain functions**

680 For systematically characterizing the response dynamics, we used stimulus ensemble  
681 statistical techniques (“reverse correlation” methods; 500 ms window) to calculate the linear  
682 filter (Figure 5) and static nonlinear gain function (Figure 6) of the recorded cells in response  
683 to a randomly flickering visual stimulus (Meister et al., 1994; Chichilnisky, 2001). First, we  
684 obtained the linear filter of each cell by calculating a spike-triggered average (STA) of the  
685 stimulus with  $\pm 1$  being “white” and “black,” respectively. As a quality measure,  $p$ -value was  
686 computed for each time bin against a null hypothesis that the STA follows a normal distribution  
687 with a mean of zero and a variance of  $1/C$ , where  $C$  is the total number of spikes. As a  
688 measure of the cell’s temporal frequency tuning, we then estimated the peak latency by fitting  
689 a difference-of-Gaussian curve to the linear filter (e.g., Figure 5A); and the spectral peak  
690 frequency by the Fourier analysis on the fitted curve (e.g., Figure 5B). The curve fitting quality  
691 was assessed by the explained variance  $R^2$  as in Eq. (5). We discarded the cells if  $p > 10^{-18}$   
692 for all time bins or  $R^2 < 0.8$ . We ran a  $t$ -test to compare the temporal frequency tuning  
693 properties at the population level across recording conditions (Figure 5C,D) or across different  
694 cell types in each recording condition (Figure 5E-H). Spatial response properties were not  
695 examined in this study because complex nonlinear kinematics of eye movements in the awake  
696 condition precluded the analysis at a high enough spatial resolution; and because it has been  
697 shown that anesthesia has no effect on the spatial processing in dLGN, a direct downstream  
698 of the retina (Durand et al., 2016).

699       Static nonlinear gain function  $P(\text{response}|\text{stimulus})$  of each cell was computed by  
700 taking the ratio between the distribution of spike-triggered stimulus ensembles  
701  $N(\text{stimulus}|\text{response})$  projected onto the  $L2$ -normalized STA (bin size, 0.1) and that of the  
702 entire stimulus ensembles  $N(\text{stimulus})$  (e.g., Figure 6B):

703 
$$P(\text{response}|\text{stimulus}) = \frac{N(\text{stimulus}|\text{response})}{N(\text{stimulus})} / \Delta t . \quad (7)$$

704 A sigmoid function was fitted to  $P(\text{response}|\text{stimulus})$  for smoothing. The neutral stimulus  
705 response was then defined as the vertical-intercept of the sigmoid function at the horizontal  
706 axis value of zero: i.e., the firing rate when the stimulus is orthogonal to the STA. We ran a  $t$ -  
707 test to compare the neutral stimulus responses and the average firing rates during the stimulus  
708 presentation at the population level across conditions (Figure 6A,C); and Mann-Whitney  $U$ -  
709 test to compare the midpoint of the sigmoid (Figure 6H).

## 710 **Cell-type classification**

711 In this study, we were not able to perform a morphological analysis of individual cells as we  
712 employed blind *in vivo* recording methods (Figure 1). We thus focused on the visual response  
713 properties for classifying cell-types in the following two ways.

714 First, we classified cells *in vivo* using the response quality, response polarity, and  
715 motion sensitivity (Figure 2). Specifically, we first divided the cells into two groups: reliably  
716 responsive ones with  $\text{SNR} > 0.15$  (Eq. (2)) and the other low quality ones (“N/A” type; Figure  
717 2B). We then set thresholds at  $\pm 0.25$  for the ON-OFF index (Eq. (3)) to identify ON, OFF, and  
718 ON/OFF types within the reliably responsive cells that increased firing in response to light  
719 increments, light decrements, and both, respectively (Figure 2C). For some cells where these  
720 measures were not available, we used the responses to the full-field sinusoidally flickering  
721 stimuli to calculate the response quality and polarity in a similar manner. Within the ON cells,  
722 we further identified an “OFF-suppressive” type if they had a significant negative amplitude in  
723 Eq. (6) with 95% confidence intervals in the parameter estimation. Independently, we also  
724 labeled cells as motion sensitive or not, based on the DS/OS indices as described above  
725 (Eq.(3); Figure 2D-F).

726 Second, because these measures are not available for the *ex vivo* data sets (Vlasiuk  
727 and Asari, 2021), we performed cell-type classification using the temporal filter properties to  
728 make a fair comparison between the *ex vivo* and *in vivo* data sets (Figures 5 and 6).

729 Specifically, we first ran a principal component analysis (PCA) on the temporal filters (*L2-*  
730 *normalized STA*) obtained in each condition (Gollisch and Meister, 2008; Asari and Meister,  
731 2014). The first two principal components (PC1, monophasic filter; and PC2, biphasic filter)  
732 were largely sufficient to fit all the temporal filter dynamics, accounting for 78-86% of the total  
733 variance in each condition. Each temporal filter is a point in the PCA biplot (i.e., the two-  
734 dimensional space spanned by PC1 and PC2), and we grouped its shape into four subtypes  
735 based on its position: monophasic OFF, biphasic OFF, monophasic ON, and biphasic ON from  
736 the first to the fourth quadrants, respectively.

## 737 **Acknowledgments**

738 This work was supported by research grants from EMBL (H.A.). The EMBL Histology Facility  
739 and the Advanced Light Microscopy Facility are acknowledged for support in sample  
740 preparation and image acquisition for histological analyses, respectively. EMBL IT Support is  
741 acknowledged for provision of computer and data storage servers. We thank Dmitry Molotkov  
742 for his help in setting up the recording rig, and all the Asari lab members as well as Cornelius  
743 Gross and Santiago Rompani for many useful discussions.

## 744 **References**

- 745 Ames, A., Nesbett, F. B. (1981). In Vitro Retina as an Experimental Model of the Central  
746 Nervous System. *J Neurochem*, 37(4), 867-877.
- 747 Asari, H., Meister, M. (2014). The projective field of retinal bipolar cells and its modulation  
748 by visual context. *Neuron*, 81(3), 641-652.
- 749 Asari, H., Pearlmutter, B. A., Zador, A. M. (2006). Sparse representations for the cocktail  
750 party problem. *J Neurosci*, 26(28), 7477-7490.
- 751 Atick, J. J., Redlich, A. N. (1990). Towards a Theory of Early Visual Processing. *Neural*  
752 *Comput*, 2(3), 308-320.

- 753       Attneave, F. (1954). Some informational aspects of visual perception. *Psychol Rev*, 61(3),  
754       183-193.
- 755       Baccus, S. A., Meister, M. (2002). Fast and slow contrast adaptation in retinal circuitry.  
756       *Neuron*, 36(5), 909-919.
- 757       Baden, T., Berens, P., Franke, K., Rosón, M. R., Bethge, M., Euler, T. (2016). The  
758       functional diversity of retinal ganglion cells in the mouse. *Nature*, 529(7586), 345-350.
- 759       Barlow, H. B., Hill, R. M., Levick, W. R. (1964). Retinal ganglion cells responding  
760       selectively to direction and speed of image motion in the rabbit. *J Physiol*, 173(3), 377-407.
- 761       Barlow, H. B., Rosenblith, W. A. (1961). Possible principles underlying the transformations  
762       of sensory messages. In *Sensory Communication* (pp. 217-234). MIT Press.
- 763       Beraneck, M., and Cullen, K. E. (2007). Activity of vestibular nuclei neurons during  
764       vestibular and optokinetic stimulation in the alert mouse. *J Neurophysiol*, 98(3), 1549-1565.
- 765       Bishop, P. O., Burke, W., Davis, R. (1962). The interpretation of the extracellular response  
766       of single lateral geniculate cells. *J Physiol (Lond)*, 162, 451-472.
- 767       Bolz, J., Rosner, G., Wässle, H. (1982). Response latency of brisk-sustained (X) and brisk-  
768       transient (Y) cells in the cat retina. *J Physiol*, 328, 171-190.
- 769       Chang, L., He, S. (2014). Light adaptation increases response latency of alpha ganglion  
770       cells via a threshold-like nonlinearity. *Neuroscience*, 256, 101-116.
- 771       Chen, C., Song, S. (2019). Differential cell-type dependent brain state modulations of  
772       sensory representations in the non-lemniscal mouse inferior colliculus. *Commun Biol*, 2,  
773       356.
- 774       Chichilnisky, E. J. (2001). A simple white noise analysis of neuronal light responses.  
775       *Network*, 12(2), 199-213.

- 776 Chichilnisky, E. J., Kalmar, R. S. (2002). Functional asymmetries in ON and OFF ganglion  
777 cells of primate retina. *J Neurosci*, 22(7), 2737-2747.
- 778 De Franceschi, G., Solomon, S. G. (2018). Visual response properties of neurons in the  
779 superficial layers of the superior colliculus of awake mouse. *J Physiol*, 596(24), 6307-6332.
- 780 Doi, E., Gauthier, J. L., Field, G. D., Shlens, J., Sher, A., Greschner, M., Machado, T. A.,  
781 Jepson, L. H., Mathieson, K., Gunning, D. E., Litke, A. M., Paninski, L., Chichilnisky, E. J.,  
782 Simoncelli, E. P. (2012). Efficient Coding of Spatial Information in the Primate Retina. *J*  
783 *Neurosci*, 32(46), 16256-16264.
- 784 Dombek, D. A., Khabbaz, A. N., Collman, F., Adelman, T. L., Tank, D. W. (2007). Imaging  
785 large-scale neural activity with cellular resolution in awake, mobile mice. *Neuron*, 56(1),  
786 43-57.
- 787 Durand, S., Iyer, R., Mizuseki, K., de Vries, S., Mihalas, S., Reid, R. C. (2016). A  
788 Comparison of Visual Response Properties in the Lateral Geniculate Nucleus and Primary  
789 Visual Cortex of Awake and Anesthetized Mice. *J Neurosci*, 36(48), 12133-12156.
- 790 Enroth-Cugell, C., Robson, J. G. (1966). The contrast sensitivity of retinal ganglion cells  
791 of the cat. *J Physiol*, 187, 517-552.
- 792 Esposti, F., Johnston, J., Rosa, J. M., Leung, K.-M., Lagnado, L. (2013). Olfactory  
793 Stimulation Selectively Modulates the OFF Pathway in the Retina of Zebrafish. *Neuron*,  
794 79(1), 97-110.
- 795 Franke, K., Chagas, A. M., Zhao, Z., Zimmermann, M. J., Bartel, P., Qiu, Y., Szatko, K. P.,  
796 Baden, T., Euler, T. (2019). An arbitrary-spectrum spatial visual stimulator for vision  
797 research. *Elife*, 8, e48779.
- 798 Fuchs, A. F., Kimm, J. (1975). Unit activity in vestibular nucleus of the alert monkey during  
799 horizontal angular acceleration and eye movement. *J Neurophysiol*, 38(5), 1140-1161.



- 800 Geng, Y., Dubra, A., Yin, L., Merigan, W. H., Sharma, R., Libby, R. T., Williams, D. R.  
801 (2012). Adaptive optics retinal imaging in the living mouse eye. *Biomed Opt Express*, 3(4),  
802 715-734.
- 803 Gjorgjieva, J., Meister, M., Sompolinsky, H. (2019). Functional diversity among sensory  
804 neurons from efficient coding principles. *PLoS Comput Biol*, 15(11), e1007476.
- 805 Gollisch, T., Meister, M. (2008). Rapid neural coding in the retina with relative spike  
806 latencies. *Science*, 319(5866), 1108-1111.
- 807 Gollisch, T., Meister, M. (2010). Eye Smarter than Scientists Believed: Neural  
808 Computations in Circuits of the Retina. *Neuron*, 65, 150-164.
- 809 Greenberg, D. S., Houweling, A. R., Kerr, J. N. D. (2008). Population imaging of ongoing  
810 neuronal activity in the visual cortex of awake rats. *Nat Neurosci*, 11(7), 749-751.
- 811 Hagins, W. A., Penn, R. D., Yoshikami, S. (1970). Dark Current and Photocurrent in Retinal  
812 Rods. *Biophys J*, 10(5), 380-412.
- 813 Haider, B., Häusser, M., Carandini, M. (2013). Inhibition dominates sensory responses in  
814 the awake cortex. *Nature*, 493(7430), 97-100.
- 815 Hartline, H. K. (1938). The response of single optic nerve fibers of the vertebrate eye to  
816 illumination of the retina. *Am J Physiol*, 121, 400-415.
- 817 Hong, G., Fu, T.-M., Qiao, M., Viveros, R. D., Yang, X., Zhou, T., Lee, J. M., Park, H.-G.,  
818 Sanes, J. R. (2018). A method for single-neuron chronic recording from the retina in awake  
819 mice. *Science*, 360(6396), 1447-1451.
- 820 Jacoby, J., Schwartz, G. W. (2018). Typology and Circuitry of Suppressed-by-Contrast  
821 Retinal Ganglion Cells. *Front Cell Neurosci*, 12, 269.
- 822 Jenkins, A., Franks, N. P., Lieb, W. R. (1999). Effects of temperature and volatile  
823 anesthetics on GABA(A) receptors. *Anesthesiology*, 90(2), 484-491.

- 824 Jouty, J., Hilgen, G., Sernagor, E., Hennig, M. H. (2018). Non-parametric Physiological  
825 Classification of Retinal Ganglion Cells in the Mouse Retina. *Front Cell Neurosci*, 12, 481.
- 826 Jun, J. J., Steinmetz, N. A., Siegle, J. H., Denman, D. J., Bauza, M., Barbarits, B., Lee, A.  
827 K., Anastassiou, C. A., Andrei, A., Aydın, Ç., Barbic, M., Blanche, T. J., Bonin, V., Couto,  
828 J., Dutta, B., Gratiy, S. L., Gutnisky, D. A., Häusser, M., Karsh, B., ... Harris, T. D. (2017).  
829 Fully Integrated Silicon Probes for High-Density Recording of Neural Activity. *Nature*,  
830 551(7679), 232-236.
- 831 Kaplan, E., Shapley, R. (1984). The origin of the S (slow) potential in the mammalian lateral  
832 geniculate nucleus. *Exp Brain Res*, 55(1), 111-116.
- 833 Kasai, M., Isa, T. (2021). Effects of light isoflurane anesthesia on organization of direction  
834 and orientation selectivity in the superficial layer of the mouse superior colliculus. *J*  
835 *Neurosci*, JN-RM-1196-21. DOI: 10.1523/JNEUROSCI.1196-21.2021
- 836 Kretschmer, F., Tariq, M., Chatila, W., Wu, B., Badea, T. C. (2017). Comparison of  
837 optomotor and optokinetic reflexes in mice. *J Neurophysiol*, 118(1), 300-316.
- 838 Krieger, B., Qiao, M., Rousso, D. L., Sanes, J. R., Meister, M. (2017). Four alpha ganglion  
839 cell types in mouse retina: Function, structure, and molecular signatures. *PLoS One*, 12(7),  
840 e0180091.
- 841 Kuffler, S. W. (1953). Discharge patterns and functional organization of mammalian retina.  
842 *J Neurophysiol*, 16(1), 37-68.
- 843 Laughlin, S. B. (2001). Energy as a constraint on the coding and processing of sensory  
844 information. *Curr Opin Neurobiol*, 11(4), 475-480.
- 845 Lee, S.-H., Dan, Y. (2012). Neuromodulation of brain states. *Neuron*, 76(1), 209-222.
- 846 Lettvin, J. Y., Maturana, H. R., McCulloch, W. S., Pitts, W. H. (1959). What the frog's eye  
847 tells the frog's brain. *Proc Inst Radio Engr*, 47, 1940-1951.

- 848 Li, J. Y., Schmidt, T. M. (2018). Divergent projection patterns of M1 ipRGC subtypes. J  
849 Comp Neurol, 526(13), 2010-2018.
- 850 Liang, L., Fratzl, A., Goldey, G., Ramesh, R. N., Sugden, A. U., Morgan, J. L., Chen, C.,  
851 Andermann, M. L. (2018). A Fine-Scale Functional Logic to Convergence from Retina to  
852 Thalamus. Cell, 173(6), 1343-1355.e24.
- 853 Liang, L., Fratzl, A., Reggiani, J. D. S., Mansour, O. E., Chen, C., Andermann, M. L. (2020).  
854 Retinal Inputs to the Thalamus Are Selectively Gated by Arousal. Curr Biol, 30(20), 3923-  
855 3934.e9.
- 856 Mani, A., Schwartz, G. W. (2017). Circuit Mechanisms of a Retinal Ganglion Cell with  
857 Stimulus-Dependent Response Latency and Activation Beyond Its Dendrites. Curr Biol,  
858 27(4), 471-482.
- 859 Masland, R. H. (2012). The Neuronal Organization of the Retina. Neuron, 76, 266-280.
- 860 Mastrorarde, D. N. (1983). Correlated firing of cat retinal ganglion cells. I. Spontaneously  
861 active inputs to X- and Y-cells. J Neurophysiol, 49(2), 303-324.
- 862 Mastrorarde, D. N. (1985). Two types of cat retinal ganglion cells that are suppressed by  
863 contrast. Vision Res, 25(9), 1195-1196.
- 864 Meister, M., Pine, J., Baylor, D. A. (1994). Multi-neuronal signals from the retina:  
865 acquisition and analysis. J Neurosci Methods, 51(1), 95-106.
- 866 Niell, C. M., Stryker, M. P. (2010). Modulation of visual responses by behavioral state in  
867 mouse visual cortex. Neuron, 65(4), 472-479.
- 868 Nomura, Y., Ikuta, S., Yokota, S., Mita, J., Oikawa, M., Matsushima, H., Amano, A.,  
869 Shimonomura, K., Seya, Y., Koike, C. (2019). Evaluation of critical flicker-fusion frequency  
870 measurement methods using a touchscreen-based visual temporal discrimination task in  
871 the behaving mouse. Neurosci Res, 148, 28-33.

- 872 Okawa, H., Sampath, A. P., Laughlin, S. B., Fain, G. L. (2008). ATP Consumption by  
873 Mammalian Rod Photoreceptors in Darkness and in Light. *Curr Biol*, 18(24), 1917-1921.
- 874 Olshausen, B. A., Field, D. J. (1996). Emergence of simple-cell receptive field properties  
875 by learning a sparse code for natural images. *Nature*, 381(6538), 607-609.
- 876 Pearson, J. T., Kerschensteiner, D. (2015). Ambient illumination switches contrast  
877 preference of specific retinal processing streams. *J Neurophysiol*, 114(1), 540-550.
- 878 Pitkow, X., Meister, M. (2012). Decorrelation and efficient coding by retinal ganglion cells.  
879 *Nat Neurosci*, 15(4), 628-635.
- 880 Populin, L. C. (2005). Anesthetics Change the Excitation/Inhibition Balance That Governs  
881 Sensory Processing in the Cat Superior Colliculus. *J Neurosci*, 25(25), 5903-5914.
- 882 Ravi, S., Ahn, D., Greschner, M., Chichilnisky, E. J., Field, G. D. (2018). Pathway-Specific  
883 Asymmetries between ON and OFF Visual Signals. *J Neurosci*, 38(45), 9728-9740.
- 884 Raz, A., Grady, S. M., Krause, B. M., Uhrich, D. J., Manning, K. A., Banks, M. I. (2014).  
885 Preferential effect of isoflurane on top-down vs. bottom-up pathways in sensory cortex.  
886 *Front Syst Neurosci*, 8, 191.
- 887 Repérant, J., Ward, R., Miceli, D., Rio, J. P., Médina, M., Kenigfest, N. B., Vesselkin, N. P.  
888 (2006). The centrifugal visual system of vertebrates: a comparative analysis of its  
889 functional anatomical organization. *Brain Res Rev*, 52(1), 1-57.
- 890 Rhode, W. S., and Smith, P. H. (1986). Encoding timing and intensity in the ventral  
891 cochlear nucleus of the cat. *J Neurophysiol*, 56(2), 261-286.
- 892 Rossant, C. (2020). Phy: interactive visualization and manual spike sorting of large-scale  
893 ephys data. GitHub. <https://github.com/cortex-lab/phy>
- 894 Sachs, M. B., Abbas, P. J. (1974). Rate versus level functions for auditory-nerve fibers in  
895 cats: tone-burst stimuli. *J Acoust Soc Am*, 56(6), 1835-1847.

- 896 Sagdullaev, B. T., McCall, M. A. (2005). Stimulus size and intensity alter fundamental  
897 receptive-field properties of mouse retinal ganglion cells in vivo. *Vis Neurosci*, 22(5), 649-  
898 659.
- 899 Sanes, J. R., Masland, R. H. (2015). The types of retinal ganglion cells: current status and  
900 implications for neuronal classification. *Annu Rev Neurosci*, 38, 221-246.
- 901 Schröder, S., Steinmetz, N. A., Krumin, M., Pachitariu, M., Rizzi, M., Lagnado, L., Harris,  
902 K. D., Carandini, M. (2020). Arousal Modulates Retinal Output. *Neuron*, 107(3), 487-495.
- 903 Sellers, K. K., Bennett, D. V., Hutt, A., Williams, J. H., Fröhlich, F. (2015). Awake vs.  
904 anesthetized: layer-specific sensory processing in visual cortex and functional connectivity  
905 between cortical areas. *J Neurophysiol*, 113(10), 3798-3815.
- 906 Shekhar, K., Lapan, S. W., Whitney, I. E., Tran, N. M., Macosko, E. Z., Kowalczyk, M.,  
907 Adiconis, X., Levin, J. Z., Nemesh, J., Goldman, M., McCarroll, S. A., Cepko, C. L., Regev,  
908 A., Sanes, J. R. (2016). Comprehensive Classification of Retinal Bipolar Neurons by  
909 Single-Cell Transcriptomics. *Cell*, 166(5), 1308-1323.e30.
- 910 Sibille, J., Gehr, C., Benichov, J. I., Balasubramanian, H., Teh, K. L., Lupashina, T.,  
911 Vallentin, D., Kremkow, J. (2021). Strong and specific connections between retinal axon  
912 mosaics and midbrain neurons revealed by large scale paired recordings. *bioRxiv*.  
913 10.1101/2021.09.09.459396
- 914 Strauss, O. (2005). The retinal pigment epithelium in visual function. *Physiol Rev*, 85(3),  
915 845-881.
- 916 Tabata, H., Shimizu, N., Wada, Y., Miura, K., Kawano, K. (2010). Initiation of the  
917 optokinetic response (OKR) in mice. *J Vis*, 10(1), 1-17.
- 918 Tengölics, Á. J., Szarka, G., Ganczer, A., Szabó-Meleg, E., Nyitrai, M., Kovács-Öller, T.,  
919 Völgyi, B. (2019). Response Latency Tuning by Retinal Circuits Modulates Signal  
920 Efficiency. *Sci Rep*, 9(1), 15110.

- 921 Ter-Mikaelian, M., Sanes, D. H., Semple, M. N. (2007). Transformation of temporal  
922 properties between auditory midbrain and cortex in the awake Mongolian gerbil. *J Neurosci*,  
923 27(23), 6091-6102.
- 924 Tien, N.-W., Pearson, J. T., Heller, C. R., Demas, J., Daniel, K. (2015). Genetically  
925 Identified Suppressed-by-Contrast Retinal Ganglion Cells Reliably Signal Self-Generated  
926 Visual Stimuli. *J Neurosci*, 35(30), 10815-10820.
- 927 Tikidji-Hamburyan, A., Reinhard, K., Seitter, H., Hovhannisyan, A., Procyk, C. A., Allen, A.  
928 E., Schenk, M., Lucas, R. J., Münch, T. A. (2015). Retinal output changes qualitatively with  
929 every change in ambient illuminance. *Nat Neurosci*, 18(1), 66-74.
- 930 Umino, Y., Pasquale, R., Solessio, E. (2018). Visual Temporal Contrast Sensitivity in the  
931 Behaving Mouse Shares Fundamental Properties with Human Psychophysics. *eNeuro*,  
932 5(4), ENEURO.0181-18.2018.
- 933 Vaiceliunaite, A., Erisken, S., Franzen, F., Katzner, S., Busse, L. (2013). Spatial integration  
934 in mouse primary visual cortex. *J Neurophysiol*, 110(4), 964-972.
- 935 van Wyk, M., Wässle, H., Taylor, W. R. (2009). Receptive field properties of ON- and OFF-  
936 ganglion cells in the mouse retina. *Vis Neurosci*, 26(3), 297-308.
- 937 Vidal-Sanz, M., Galindo-Romero, C., Valiente-Soriano, F. J., Nadal-Nicolás, F. M., Ortin-  
938 Martinez, A., Rovere, G., Salinas-Navarro, M., Lucas-Ruiz, F., Sanchez-Migallon, M. C.,  
939 Sobrado-Calvo, P., Aviles-Trigueros, M., Villegas-Pérez, M. P., Agudo-Barriuso, M. (2017).  
940 Shared and Differential Retinal Responses against Optic Nerve Injury and Ocular  
941 Hypertension. *Front Neurosci*, 11, 235.
- 942 Vlasiuk, A., Asari, H. (2021). Feedback from retinal ganglion cells to the inner retina. *PLoS*  
943 *One*, 16(7), e0254611.
- 944 Wang, Y. V., Weick, M., Demb, J. B. (2011). Spectral and temporal sensitivity of cone-  
945 mediated responses in mouse retinal ganglion cells. *J Neurosci*, 31(21), 7670-7681.

- 946 Warchol, M. E., Dallos, P. (1990). Neural coding in the chick cochlear nucleus. *J Comp*  
947 *Physiol A*, 166(5), 721-734.
- 948 Warwick, R. A., Kaushansky, N., Sarid, N., Golan, A., Rivlin-Etzion, M. (2018).  
949 Inhomogeneous Encoding of the Visual Field in the Mouse Retina. *Curr Biol*, 28(5), 655-  
950 665.e3.
- 951 Weyand, T. G. (2007). Retinogeniculate transmission in wakefulness. *J Neurophysiol*,  
952 98(2), 769-785.
- 953 Wright, P. W., Brier, L. M., Bauer, A. Q., Baxter, G. A., Kraft, A. W., Reisman, M. D., Bice,  
954 A. R., Snyder, A. Z., Lee, J.-M., Culver, J. P. (2017). Functional connectivity structure of  
955 cortical calcium dynamics in anesthetized and awake mice. *PLoS One*, 12(10), e0185759.
- 956 Wu, J. S., Young, E. D., Glowatzki, E. (2016). Maturation of Spontaneous Firing Properties  
957 after Hearing Onset in Rat Auditory Nerve Fibers: Spontaneous Rates, Refractoriness,  
958 and Interfiber Correlations. *J Neurosci*, 36(41), 10584-10597.
- 959 Yan, W., Laboulaye, M. A., Tran, N. M., Whitney, I. E., Benhar, I., Sanes, J. R. (2020).  
960 Mouse Retinal Cell Atlas: Molecular Identification of over Sixty Amacrine Cell Types. *J*  
961 *Neurosci*, 40(27), 5177-5195.
- 962 Yger, P., Spampinato, G. L., Esposito, E., Lefebvre, B., Deny, S., Gardella, C., Stimberg,  
963 M., Jetter, F., Zeck, G., Picaud, S., Duebel, J., Marre, O. (2018). A spike sorting toolbox  
964 for up to thousands of electrodes validated with ground truth recordings in vitro and in vivo.  
965 *Elife*, 7, e34518.
- 966 Yin, L., Geng, Y., Osakada, F., Sharma, R., Cetin, A. H., Callaway, E. M., Williams, D. R.,  
967 Merigan, W. H. (2013). Imaging light responses of retinal ganglion cells in the living mouse  
968 eye. *J Neurophysiol*, 109(9), 2415-2421.



- 969 Yin, L., Masella, B., Dalkara, D., Zhang, J., Flannery, J. G., Schaffer, D. V., Williams, D.  
970 R., Merigan, W. H. (2014). Imaging light responses of foveal ganglion cells in the living  
971 macaque eye. *J Neurosci*, 34(19), 6596-6605.
- 972 Zaghloul, K. A., Boahen, K., Demb, J. B. (2003). Different circuits for ON and OFF retinal  
973 ganglion cells cause different contrast sensitivities. *J Neurosci*, 23(7), 2645-2654.
- 974 Zhang, Y., Kim, I.-J., Sanes, J. R., Meister, M. (2012). The most numerous ganglion cell  
975 type of the mouse retina is a selective feature detector. *Proc Natl Acad Sci U S A*, 109(36),  
976 E2391-E2398.
- 977 Zhao, X., Liu, M., Cang, J. (2014). Visual cortex modulates the magnitude but not the  
978 selectivity of looming-evoked responses in the superior colliculus of awake mice. *Neuron*,  
979 84(1), 202-213.
- 980 Zohar, O., Shackleton, T. M., Nelken, I., Palmer, A. R., Shamir, M. (2011). First spike  
981 latency code for interaural phase difference discrimination in the guinea pig inferior  
982 colliculus. *J Neurosci*, 31(25), 9192-9204.
